# The multi PAM2 protein Upa2 functions as novel core component of endosomal mRNA transport

**Silke Jankowski<sup>1, †</sup>, Thomas Pohlmann<sup>1, †</sup>, Sebastian Baumann<sup>1, #</sup>, Kira Müntjes<sup>1, 1</sup>,  
Senthil Kumar Devan<sup>1</sup>, Sabrina Zander<sup>1</sup> and Michael Feldbrügge<sup>1, \*</sup>**

<sup>†</sup> equal contribution

<sup>1</sup> Heinrich Heine University Düsseldorf, Institute for Microbiology, Cluster of Excellence on Plant Sciences, 40204 Düsseldorf, Germany

# present address: Cell and Developmental Biology, Centre for Genomic Regulation (CRG),  
Barcelona, Spain

**Running title:** Multi PAM2 protein for mRNA transport

**Word count:** 4275

**Key words:** endosome / microtubule / MLLE domain / PAM2 motif / poly(A)-binding  
protein / RNA transport

\* Corresponding author:

Dr. Michael Feldbrügge

Institute for Microbiology, Cluster of Excellence on Plant Sciences

Heinrich Heine University Düsseldorf; 40204 Düsseldorf, Germany,

Phone: +49 (211) 81-15475,

feldbrue@hhu.de

1 **Abstract**

2 mRNA transport determines spatiotemporal protein expression. Transport units are higher-  
3 order ribonucleoprotein complexes containing cargo mRNAs, RNA-binding proteins and  
4 accessory proteins. Endosomal mRNA transport in fungal hyphae belongs to the best-studied  
5 translocation mechanisms. Although several factors are known, additional core components  
6 are missing. Here, we describe the 232 kDa protein Upa2 containing multiple PAM2 motifs  
7 (poly[A]-binding protein [Pab1] associated motif 2) as a novel core component. Loss of Upa2  
8 disturbs transport of cargo mRNAs and associated Pab1. Upa2 is present on almost all  
9 transport endosomes in an mRNA dependent-manner. Surprisingly, all four PAM2 motifs are  
10 dispensable for function during unipolar hyphal growth. Instead, Upa2 harbours a novel N-  
11 terminal effector domain as important functional determinant as well as a C-terminal GWW  
12 motif for specific endosomal localisation. In essence, Upa2 meets all the criteria of a novel  
13 core component of endosomal mRNA transport and appears to carry out crucial scaffolding  
14 functions.

15

## 16 **Introduction**

17 Active transport of mRNAs determines when and where proteins are synthesised. Such  
18 trafficking events are important for a wide variety of different cellular processes like  
19 asymmetric cell division, polar growth, embryonic development and neuronal activity [1, 2].  
20 Several mRNA translocation mechanisms have been described. During cytokinesis of  
21 *Saccharomyces cerevisiae*, for example, the actin-dependent transport of *ASH1* mRNA is  
22 mediated by the concerted binding of the RNA-binding proteins (RBP) She2p and She3p.  
23 These RBPs connect the cargo mRNA to the myosin motor Myo4 for transport towards the  
24 daughter cell [3, 4]. In highly polarised cells such as fungal hyphae and neurons, mRNAs are  
25 transported along microtubules over long distances. Here, molecular motors such as kinesins  
26 and dynein are involved. Among the best studied examples of microtubule-dependent  
27 translocation is the mRNA transport on shuttling endosomes during polar hyphal growth in  
28 the fungus *Ustilago maydis* [5].

29 Upon infection of corn, *U. maydis* switches from budding to hyphal growth [6, 7]. The  
30 resulting infectious hyphae grow with a defined axis of polarity: they expand at the apical  
31 pole and insert septa at the basal pole resulting in the formation of characteristic sections  
32 devoid of cytoplasm. In this growth mode, hyphae depend on active transport along  
33 microtubules. Loss of long-distance transport results in aberrant hyphal growth. Characteristic  
34 of this defect is the formation of bipolar growing cells. Important carriers are Rab5a-positive  
35 endosomes that shuttle along microtubules by the concerted action of the plus-end directed  
36 Kinesin-3 type motor Kin3 and the minus-end directed cytoplasmic dynein Dyn1/2 [8, 9].  
37 These endosomes carry characteristic markers of early endosomes involved in endocytosis  
38 [10]. However, during polar growth they also function as transport endosomes moving  
39 organelles, like peroxisomes, and mRNAs with associated ribosomes attached to their  
40 cytoplasmic surface [11, 12].

Jankowski, Pohlmann et al.

41 The key RNA-binding protein for mRNA transport is Rrm4, an RRM (RNA recognition  
42 motif) protein containing tandem N-terminal RRMs separated by a spacer from a third RRM  
43 domain (Fig 1A). The mRNAs of all four septins were identified to be important cargo  
44 mRNAs, which are most likely translationally active while being transported on endosomes  
45 [12-14]. Consequently, the translation products Cdc3, Cdc10, Cdc11 and Cdc12 form  
46 heteromeric complexes on the cytoplasmic surface of endosomes in an Rrm4-dependent  
47 manner. These septin complexes are delivered to the hyphal growth pole to form a  
48 longitudinal gradient of filaments [12, 14]. A recent transcriptome-wide view of endosomal  
49 mRNA transport revealed that Rrm4 binds thousands of mRNAs preferentially in their 3'  
50 UTR in close proximity to the small glycine rich protein Grp1. This extensive mRNA  
51 transport is most likely needed for the distribution of mRNAs within the fast-growing hypha  
52 as well as for the transport of specific mRNAs encoding e.g. septins for heterooligomerisation  
53 [15].

54 At its C-terminus, Rrm4 carries two MademoisELLE (MLLE) domains that function as  
55 peptide binding pockets for specific interaction with the PAM2-like motifs of Upa1. Upa1  
56 links Rrm4-containing mRNPs to transport endosomes using a FYVE zinc finger domain to  
57 recognise phosphatidylinositol-3-phosphate lipids of early endosomes. [16]. In addition, Upa1  
58 also carries a classical PAM2 motif for interaction with the MLLE domain of the poly(A)-  
59 binding protein Pab1, an additional component of endosomal mRNPs [7, 17]. Although we  
60 already identified a number of components of endosomal mRNA transport, key factors might  
61 still be missing. Here, we unravelled and characterized one such factor, the protein Upa2, a  
62 second *Ustilago* PAM2 motif protein that had previously been identified by bioinformatic  
63 prediction of PAM2-containing proteins [16].

64

## 65 **Results**

### 66 **The PAM2-containing protein Upa2 interacts with Pab1**

67 Upa2 (*Ustilago* PAM2 protein 2; UMAG\_10350) is a 2121 amino acid (aa) protein with a  
68 conserved coiled coil domain of unknown function at its C-terminus, as well as four PAM2  
69 motifs for potential interaction with the MLLE domain of Pab1. One PAM2 motif is situated  
70 at the immediate N-terminus and three in the central region of the protein (Fig 1A-B).

71 In order to validate the predicted PAM2 motifs we performed yeast two-hybrid studies  
72 that have already been successfully applied to demonstrate an interaction between Pab1 and  
73 the PAM2 motif of Upa1 [16]. Full-length Upa2 shows weak interaction with Pab1 but did  
74 not interact with Upa1 or Rrm4 (Fig 1C, Fig EV1A-B). The latter is consistent with the  
75 observation that PAM2-like motifs for Rrm4 interaction are missing in Upa2 [16]. Upon  
76 mapping the interaction domain of Upa2 with Pab1 we observed that the PAM2-containing  
77 N-terminal part of Upa2 (aa 1-1216) but not the C-terminal part (aa 1217-2121) interacted  
78 with Pab1 (Fig 1C). The interaction of Upa2 with Pab1 was mediated by the MLLE domain  
79 of Pab1, since this domain was necessary and sufficient for reporter gene expression in the  
80 yeast two-hybrid system (Fig 1C, Fig EV1A). Mutational analysis of the PAM2 motifs in  
81 Upa2 revealed that a single PAM2 motif was sufficient for interaction with the MLLE domain  
82 of Pab1 or full length Pab1 (Fig EV1A). Mutating all PAM2 motifs resulted in loss of  
83 interaction of Upa2 with the MLLE domain of Pab1 (Fig 1C) and strongly reduced interaction  
84 with Upa2 and full length Pab1 (Fig EV1A).

85 To verify this binding behaviour, we tested the interaction of the central PAM2 triplet of  
86 Upa2 (aa 834-1216) with the MLLE domains of Pab1 by GST-pulldown experiments using  
87 variants expressed in *Escherichia coli*. These experiments confirmed the specific interaction  
88 of the PAM2 motifs of Upa2 with the MLLE domain of Pab1. The interaction strength was

Jankowski, Pohlmann et al.

89 dependent on the number of functional PAM2 motifs (Fig 1D). As expected, PAM2 motifs of  
90 Upa2 did not interact with Rrm4 (Fig EV1C-D).

91 Since coiled coil domains have been described as dimerization regions, we tested this in a  
92 yeast two-hybrid assay. When appended to both BD and AD reporter proteins the predicted  
93 C-terminal coiled coil domain of Upa2 supported yeast growth on selective medium  
94 suggesting that this region indeed functions as a dimerization domain (Fig 1E). Taken  
95 together, Upa2 contains multiple functional PAM2 motifs for interaction with Pab1 and a C-  
96 terminal dimerization domain. The interaction with Pab1 is the first hint that Upa2 might  
97 function in endosomal mRNA transport.

#### 98 **Upa2 is essential for efficient unipolar hyphal growth**

99 If Upa2 is indeed important for endosomal mRNA transport, loss of Upa2 should exhibit  
100 phenotypes similar to mutations in the previously identified transport components Rrm4 and  
101 Upa1 [16]. To test this assumption, we generated *upa2* deletion mutants in the genetic  
102 background of laboratory strain AB33. In this strain, hyphal growth can be elicited  
103 synchronously and reproducibly by switching the nitrogen source in the medium [18]. Hyphae  
104 grow with a defined axis of polarity: they expand at the apical tip and insert septa at their base  
105 leading to the formation of characteristic empty sections (Fig 2A). While loss of Upa2 did not  
106 affect growth or alter shape of yeast cells (Fig EV2A-B) *upa2* $\Delta$  strains exhibited a bipolar  
107 growth phenotype and the formation of empty sections was delayed. This aberrant growth  
108 mode is typical for defects in microtubule-dependent transport and has been described for loss  
109 of the key proteins of endosomal mRNA transport like Rrm4 and Upa1 (Fig 2A-B).  
110 Analysing the *upa1* $\Delta$ /*upa2* $\Delta$  double mutant revealed that the number of hyphae exhibiting  
111 aberrant bipolar hyphal growth was not additive (Fig EV2C), providing genetic evidence that  
112 both PAM2-containing proteins function in the same cellular process.

113 A second read-out for defects in the endosomal mRNA transport machinery is the  
114 unconventional secretion of chitinase Cts1 [16, 19]. Loss of Upa2 resulted in reduced  
115 extracellular Cts1 activity specifically during hyphal growth. This is reminiscent of defective  
116 Cts1 secretion upon deletion of *rrm4* and *upa1* (Fig EV2D). Hence, Upa2 might function in  
117 concert with Rrm4 and Upa1 during endosomal mRNA transport.

118 This hypothesis was supported by a phylogenetic analysis showing that orthologs of  
119 Upa2 were found in several basidiomycete fungi with comparable spacing of the predicted  
120 PAM2 motifs (Fig 2C). Consistent with the notion that Rrm4, Upa1 and Upa2 function  
121 together, these fungi also had orthologs for Rrm4 and Upa1. Notably, Upa2 was absent in  
122 *Malassezia globosa*, which presumably has lost the endosomal mRNA transport machinery,  
123 because it lacks a clear ortholog of Rrm4 (Fig 2C) [20]. In essence, the evolutionarily  
124 conserved Upa2 is a novel factor essential for efficient unipolar growth that might function in  
125 endosomal mRNA transport.

### 126 **Upa2 shuttles on Rrm4-positive transport endosomes**

127 *upa2* and *rrm4* appear to be genetically and phylogenetically linked. We therefore examined  
128 whether the protein can also be found on transport endosomes by expressing a functional  
129 version of Upa2 with C-terminally fused Gfp (eGfp, Clontech; Fig 2A-B; Fig EV2D).  
130 Fluorescence microscopy revealed that in hyphae Upa2-Gfp localised exclusively in  
131 bidirectionally moving units (Fig 3A, Video EV1). Movement was inhibited by benomyl  
132 indicating that it was microtubule-dependent (Fig 3A, Video EV1). Importantly, Upa2-Gfp  
133 shuttling resembled the movement of Rrm4-Gfp and Pab1-Gfp (Fig 3A, Video EV1). This  
134 holds true for the amount of processive signals as well as for their velocity (Fig 3B-C). Hence,  
135 Upa2 appeared to shuttle on Rrm4-positive transport endosomes [8, 16].

136 For experimental verification of endosomal shuttling we stained processive endosomes  
137 with the lipophilic dye FM4-64 [10]. Using dual-colour dynamic live imaging, we detected

Jankowski, Pohlmann et al.

138 extensive co-localisation of Upa2-Gfp and FM4-64-stained, processively moving endosomes  
139 (Fig 3D-E). Furthermore, we tested strains co-expressing Upa2-Gfp and Rrm4-mCherry or  
140 Pab1-mCherry (functional C-terminal fusions with the monomeric red fluorescent protein  
141 mCherry) [12, 13]. In this instant we also observed extensive co-localisation of Upa2 and  
142 Rrm4 (Fig 3D-E, Video EV2) indicating that Upa2 was present on almost all shuttling  
143 endosomes [8, 16]. Upa2-Gfp also co-localised with processively moving Pab1-mCherry (Fig  
144 3D-E). However, unlike Rrm4, Pab1-mCherry additionally localised in the cytoplasm  
145 resulting in diffuse and static signals that are easily detectable around the region of the  
146 nucleus (Fig 3A, D) [12, 13]. Notably, Upa2 did not exhibit this cytoplasmic staining  
147 indicating that it is not present in cytoplasmic Pab1-containing complexes, but specifically  
148 interacts with endosome-associated Pab1 (Fig 3A, D, E). In essence, Upa2 shuttles  
149 exclusively on almost all Rrm4-positive transport endosomes supporting the notion that it is a  
150 new component of endosomal mRNPs.

#### 151 **Endosomal localisation of Upa2 depends on the RNA-binding capacity of Rrm4**

152 Since Upa2 proved to be an endosomal protein, we investigated the functional relationship  
153 between Upa2 and Rrm4 by studying the subcellular localisation of endosomal mRNP  
154 components in *rrm4Δ* strains. As previously described, the endosomal localisation of Upa1-  
155 Gfp is not affected in *rrm4Δ* strains, because its interaction is mRNA-independent and  
156 mediated by its FYVE domain (Fig 4A-B, Video EV3) [16]. In contrast, Pab1-Gfp is no  
157 longer detectable on shuttling endosomes in *rrm4Δ* strains indicating that without Rrm4 no  
158 mRNAs are transported on endosomes (Fig 4A-B, Video EV4) [13]. Interestingly, the  
159 endosomal localisation of Upa2 was also no longer detectable in *rrm4Δ* strains (Fig 4A-B,  
160 Video EV5) suggesting that the association of Upa2 depends on direct interaction with  
161 endosomal mRNP components. In corresponding Western blot experiments, we verified that



162 loss of Rrm4 did not alter the protein amounts of Upa2-Gfp, Pab1-Gfp or Upa1-Gfp (Fig  
163 EV2E).

164 To investigate a possible mRNA-dependent interaction of Upa2 with shuttling endosomes  
165 we studied the effect of the allele Rrm4<sup>mR1</sup>-Rfp (Rrm4 variant with C-terminally fused  
166 monomeric Rfp). Previously, it was shown that Rrm4<sup>mR1</sup> carrying a loss of function mutation  
167 in the first RRM domain resulted in drastically reduced RNA binding of Rrm4 [17]. Notably,  
168 Upa2 is no longer detectable on endosomes in a Rrm4<sup>mR1</sup>-Rfp background, whereas for Pab1  
169 we observed a strong reduction in movement (Fig 4C-D, Videos EV6-EV7). This indicates  
170 that the recruitment of Upa2 to motile transport endosomes is dependent on the RNA-binding  
171 capacity of Rrm4. Taken together, although loss of the endosomal components Upa1 and  
172 Upa2 results in similar defects during hyphal growth, the mode of endosomal localisation is  
173 clearly different. Contrary to Upa1, endosomal localisation of Upa2 is mRNA-dependent,  
174 suggesting an interaction with mRNA either directly or indirectly through a protein  
175 component of mRNPs such as Pab1 that Upa2 binds via its PAM2 motifs.

176 **Upa2 carries two functionally important regions, a N-terminal effector domain and a C-**  
177 **terminal GWW motif**

178 Since the mRNA-dependent localisation could be explained by the direct PAM2-dependent  
179 interaction with Pab1, we tested the role of the identified PAM2 motifs of Upa2 with regards  
180 to function and endosomal localisation. Therefore, we expressed Upa2-Gfp variants in  
181 laboratory strain AB33 carrying mutations in one, in multiple and in all identified PAM2  
182 motifs. Surprisingly, none of the PAM2 mutations affected the hyphal growth of *U. maydis*  
183 indicating that the interaction of Upa2 with Pab1 is not essential for its role during hyphal  
184 growth (Fig 5A-B). Furthermore, endosomal shuttling was not affected by mutating all four  
185 PAM2s indicating that the interaction with Pab1 is dispensable for endosomal localisation  
186 (Fig EV3A). Hence, Upa2 must contain so far unknown domains critical for endosomal  
187 transport functions.

Jankowski, Pohlmann et al.

188 To map these domains, we studied N-terminal truncations carrying C-terminal Gfp  
189 fusions (Fig 5C). Respective alleles were integrated at the homologous locus replacing the  
190 endogenous copy of *upa2*. Expression was driven by the native *upa2* promoter. Removal of  
191 the first 338 amino acids did not interfere with the function of the protein (Upa2-339-2121;  
192 Fig 5C-D). However, additional truncations resulted in increase of bipolar hyphae indicating  
193 reduced (Upa2-399-2121) or loss of function (Upa2-599-2121, 960-2121, 1217-2121, 1721-  
194 2121 and 1958-2121; Fig 5C-D, Fig EV3B). Importantly, protein amounts (e.g. 399-2121 and  
195 399-2121; Fig EV3C) and endosomal shuttling of these versions were not drastically affected  
196 (Fig 5E-F; Fig EV3D-E). Hence, a currently unknown effector domain important for  
197 endosomal mRNA transport is located between amino acid position 339 and 599. Notably, the  
198 non-functional variant Upa2-599-2121 still contained three PAM2 motifs, consistent with the  
199 finding that the interaction with Pab1 is not sufficient for function.

200 For mapping of the domain that mediates endosomal localisation of Upa2, we assayed  
201 additional N-terminal truncations. All variants still shuttled indicating that the last 163 amino  
202 acids were sufficient for endosomal shuttling (Fig 5C, E-F). Upa2-1217-2121 did no longer  
203 contain any PAM2 region for interaction with Pab1 (Fig 5C). This was consistent with the  
204 finding that the PAM2 motifs of Upa2 were not essential for endosomal localisation. Closer  
205 inspection by sequence comparison revealed a conserved GWW sequence at the very C-  
206 terminus (Fig 5G), which was shown in other proteins to function in protein/protein  
207 interaction [21, 22]. Mutating this short sequence resulted in loss of shuttling without drastic  
208 changes in protein amounts (Fig 5F, Fig EV3F). This holds true when testing the mutation in  
209 the context of the full length protein (Fig 5H, Video EV8). Importantly, we also observed a  
210 loss of function phenotype for this mutation, i.e. an increased number of bipolar hyphae (Fig  
211 5H, Fig EV3G). This was not due to altered protein amounts (Fig EV3F). Thus, the conserved  
212 C-terminal GWW motif is essential for endosomal localisation of Upa2 and endosomal  
213 localisation is important for the function of the protein. In essence, besides the PAM2 motifs,

214 Upa2 contains a functionally important N-terminal effector domain and a C-terminal GWW  
215 motif for interaction with an endosomal mRNP component (see Discussion).

### 216 **Loss of Upa2 causes defects in the formation of endosomal mRNPs**

217 Finally, we studied the role of Upa2 during endosomal transport in closer detail. Observation  
218 of endosomal shuttling of Rrm4-Gfp, Upa1-Gfp and Rab5a-Gfp revealed that loss of Upa2  
219 did not cause drastic alterations in bidirectional movement. We did notice a slight increase in  
220 the velocity and amount of shuttling signals (Fig 6A-C, Videos EV9-EV12). In case of Rrm4-  
221 Gfp we observed that a substantial fraction of the protein also stained structures that  
222 resembled microtubule bundles (Fig 6A; Fig EV4B). Consistently, in benomyl treated hyphae  
223 bundle-like Rrm4-Gfp signals were no longer detected (Fig EV4B-C). This suggests that  
224 Rrm4 localisation is disturbed in the absence of Upa2.

225 Interestingly, studying shuttling of Pab1-Gfp revealed that the amount of Pab1-positive  
226 endosomes was reduced to about 50% (Fig. 6A-B), suggesting that Upa2 is needed for an  
227 efficient interaction of Pab1-containing mRNAs with endosomes. To address this notion more  
228 directly we applied RNA live imaging [23]. We studied four different target mRNAs of  
229 Rrm4-dependent endosomal mRNA transport encoding the ubiquitin fusion protein Ubi1, the  
230 small G protein Rho3, as well as the septins Cdc3 and Cdc12 (Fig EV4D) [12-14].  
231 Importantly, in the absence of Upa2 we observed in all four cases that the number of  
232 processively transported mRNAs was reduced to about 50% (Fig 6D-E). This is consistent  
233 with the shuttling of Pab1-Gfp that was reduced to comparable extend (Fig 6A-B). The range  
234 of movement (Fig 6F) and the velocity (Fig EV4E) of transported *ubi1*, *rho3*, *cdc3* and *cdc12*  
235 mRNA particles was not changed significantly. Thus, loss of Upa2 affects most likely  
236 assembly or long-term association of mRNPs for transport.

237 An important function of endosomal septin mRNA transport is the local assembly of  
238 septin heteromeric subunits that are transported to hyphal growth poles to form higher-order

Jankowski, Pohlmann et al.

239 filaments with a gradient emanating from this pole [12, 14]. To address the role of Upa2 we  
240 used a functional septin fusion protein Cdc3-Gfp as read-out (Cdc3 carrying eGfp at its N-  
241 terminus; notably the 5' and 3' untranslated regions of *cdc3* were preserved to keep potential  
242 regulatory elements and Rrm4 binding sites intact) [12, 14]. Loss of Upa2 abolished  
243 endosomal shuttling of Cdc3-Gfp and as an expected consequence also the Cdc3-Gfp  
244 containing gradient at hyphal tips was no longer detectable (Fig 6G-I, Video EV14). The  
245 strong reduction of septin protein on the surface of endosomes is consistent with the fact that  
246 stable endosomal localisation of septin subunits depend on each other[14]. Since *cdc3* and  
247 *cdc12* mRNAs are both reduced to 50% the amount of translated protein appears to be  
248 insufficient to support endosomal localisation (see Discussion). In essence, Upa2 is essential  
249 for the correct association of mRNAs, Pab1, as well as Rrm4, on endosomes. Thus, we  
250 identified an endosome-specific and functionally important factor that functions as novel core  
251 component of endosomal mRNA transport.

252

## 253 **Discussion**

254 Functional units of mRNA transport are higher-order mRNPs consisting of cargo mRNAs,  
255 RNA-binding proteins and additional interacting proteins [5]. A crucial task is to differentiate  
256 between core components that are essential to orchestrate transport, and accessory  
257 components. The latter might mediate for example translational regulation of cargo mRNAs.  
258 Here, we identified Upa2 as a novel core component of endosomal mRNA transport. This  
259 interactor of the poly(A)-binding protein appears to be important for assembly or stabilisation  
260 of higher-order mRNPs for endosomal transport suggesting that it functions as a scaffold  
261 protein (Fig 7).

262 **A novel multi PAM2 protein for endosomal mRNA transport**

263 Upa2 is a large protein of 232 kDa that contains four functional PAM2 motifs for interaction  
264 with the C-terminal MLLE domain of Pab1. It is known from earlier structural studies that the  
265 C-terminal MLLE domain of human PABC1 forms a defined peptide pocket to accommodate  
266 various PAM2 sequences [24]. Currently, only three MLLE-containing proteins are described:  
267 the poly(A)-binding protein, the E3 ubiquitin ligase UBR5 and mRNA transporter Rrm4.  
268 UBR5 is a HECT-type (homologous to the E6AP C terminus) ligase that functions in  
269 translational regulation and microRNA-mediated gene silencing [25].

270 The PAM2 motif is present in various PABC1-interaction partners such as eRF3, GW182  
271 and PAN3 functioning in various steps of posttranscriptional control such as translation,  
272 miRISC assembly and deadenylation, respectively [26]. The vast majority of proteins harbour  
273 a single PAM2 motif, only eRF3 and Tob contain two overlapping PAM2 motifs for MLLE  
274 interaction [27, 28]. Therefore, it is exceptional to find four PAM2 motifs in Upa2 and due to  
275 the potential dimerisation via its C-terminal coiled coil region Upa2 offers an extensive  
276 interaction platform for Pab1 (Fig 7).

277 Experimental evidence confirmed that the PAM2 motifs of Upa2 interact with Pab1.  
278 However, it seems to be an utter paradox that these evolutionarily conserved PAM2 motifs  
279 are not important for the function of Upa2 during endosomal mRNA transport. The same  
280 holds true for Upa1, where the PAM2 motif is also dispensable for function [16]. A possible  
281 explanation is a high level of redundancy. This is supported by the fact that in endosomal  
282 mRNPs there are verified PAM2 motifs in Upa1 and Upa2 as well as additional cryptic  
283 versions in Rrm4. It is conceivable that all PAM2 sequences and their variants must be  
284 mutated to observe defects in mRNA transport and consequently in hyphal growth. In fact,  
285 redundancy was already observed during the study of PAM2-like motifs. Only deletion of  
286 both PAM2-like sequences in Upa1 resulted in loss of function [16]. Alternatively, we might  
287 not be able to detect the functional significance of the PAM2 / Pab1 interaction under optimal

Jankowski, Pohlmann et al.

288 laboratory conditions. The interaction could be of specific importance under certain stress  
289 conditions. Comparably, a function of the small glycine rich protein Grp1 was only observed  
290 during hyphal growth under cell wall stress conditions [15].

291 Besides PAM2 motifs and a coiled coil region for dimerization, we identified two  
292 additional functionally important regions. Firstly, we succeeded in mapping a novel N-  
293 terminal effector domain. Interestingly, this domain is embedded in a part of the protein that  
294 is predicted to be rich in intrinsically disordered regions (IDRs; Fig EV5). In the future, we  
295 need to carry out an extensive fine mapping to identify clear boundaries of this domain and  
296 identify the respective interaction partner. Secondly, we discovered a C-terminal GWW motif  
297 that is essential for the endosomal localisation of Upa2. Since the presence of Upa2 depends  
298 on the RNA-binding capacity of Rrm4, we assume that the GWW motif does not bind  
299 endosomal lipids directly. Most likely, it interacts with a protein component of endosomal  
300 mRNPs (Fig 7). This assumption is supported by the fact that an evolutionarily conserved  
301 GWW motif at the C-terminus of bacterial endoribonuclease RNase E interacts with a  
302 peptide-binding pocket of a PNPase (exoribonuclease polynucleotide phosphorylase; 21, 22].  
303 Furthermore, GWW motifs have been implicated in intramolecular interactions of two SH3  
304 domains of the NADPH oxidase component p47<sup>phox</sup> [29]. Related dispersed GW motifs in the  
305 posttranslational regulator GW182 mediate recruitment of CCR4-NOT deadenylation  
306 components during miRNA-mediated repression [30]. In essence, we identified at least four  
307 different types of interfaces for protein/protein interactions in Upa2 supporting the hypothesis  
308 that it serves as a scaffold protein.

### 309 **The function of Upa2 during endosomal transport**

310 In order to study the function of Upa2 *in vivo* we combined genetic with cell biological  
311 approaches. Loss of Upa2 causes the same aberrant growth phenotype and reduced Cts1  
312 secretion as observed in *rrm4* $\Delta$  and *upa1* $\Delta$  strains [13, 16], suggesting that these proteins

313 function in the same pathway. This is supported by a phylogenetic analysis showing the co-  
314 appearance of all three proteins.

315 The bipolar hyphal growth phenotype can in part be explained by the defects in forming  
316 the gradient of septin filaments at the growth pole, since septins are important during the  
317 initial phase of unipolar hyphal growth [12, 14]. The formation of the septin gradient depends  
318 on the endosomal transport of septin heteromers and in turn heteromer assembly depends on  
319 endosomal transport of the septin encoding mRNAs [12, 14]. Thus, the most rational  
320 explanation for the observed defects in hyphal growth in *upa2Δ* strains is the reduced  
321 transport of septin mRNAs resulting in fewer septin proteins on endosomes. Since the  
322 presence of the different septins on transport endosomes are interdependent [14], the reduced  
323 amount might not be able to support endosomal assembly and localisation of septin proteins  
324 causing the observed defects in septin gradients. The hypothesis of local translation on the  
325 endosomal surface for septin assembly [12, 14] has recently been supported by the finding  
326 that most heteromeric protein complexes are co-translationally assembled in eukaryotes [31].

327 Loss of *Upa2* also causes a slight increase in the amount and velocity of transport  
328 endosomes suggesting that the absence of *Upa2* and the reduced associated mRNA cargos has  
329 an influence on transport endosomes in general. However, the most profound differences were  
330 recognized studying the mRNP components *Rrm4* and *Pab1*. We observed an aberrantly  
331 strong formation of *Rrm4* on microtubules and reduced endosomal localisation of *Pab1*.  
332 Hence, *Upa2* appears to be crucial for the stable association of mRNPs on the surface of  
333 endosomes during transport. This is consistent with important key findings of this study that  
334 *Upa2*, like *Rrm4*, specifically localises to transport endosomes and that it is present an almost  
335 all transport endosomes. In conjunction with the aforementioned scaffolding function, *Upa2*  
336 fulfils the necessary criteria to function as a novel core component of endosomal mRNP  
337 transport.

338 **Conclusions**

339 In recent years the identification of components of the endosomal mRNA transport machinery  
340 in *U. maydis* has advanced significantly (Fig 7). Importantly, it is the first system, where a  
341 transcriptome-wide binding landscape of the key RBP is available. Comparing bound RNAs  
342 of Rrm4 with the accessory component Grp1 revealed that Rrm4 orchestrates a tailored  
343 transport strategy for distinct sets of cargo mRNAs [15]. Here, we add the evolutionarily  
344 conserved Upa2 as an important novel piece to our jigsaw puzzle of endosomal mRNA  
345 transport.

346 Key concepts appear to be conserved throughout evolution and might also be applicable  
347 to higher eukaryotes. In fungi, for example, Rrm4, Upa1 and Upa2 are conserved throughout  
348 Basidiomycetes suggesting that endosomal mRNA transport is more wide-spread than  
349 currently anticipated [20]. Consistently, in animal systems, endosomal components have been  
350 implicated in mRNA transport during axonal growth [32, 33] and mRNAs associated with  
351 Rab5-positive endosomes were described in plants [34]. More recently, endosomal mRNA  
352 transport and coupled translation at late endosomes were described to be crucial for  
353 mitochondrial function in polar growing axons [35]. Hence, endosome-coupled translation  
354 seems to be conserved from fungi to men and is now critical to obtain insights in the  
355 mechanisms of how mRNPs stably associate with endosomes [36]. Finally, discovering the  
356 key RNA-binding protein Rrm4 that is linked intensively and intimately with endosomal  
357 membranes fits to the new emerging concept that RNA and membrane biology are tightly  
358 intertwined. Membrane-associated RBPs (memRBPs) are most likely important at all  
359 intracellular membranes to orchestrate spatio-temporal expression [37]. These findings stress  
360 the vital role of *U. maydis* as a model for RNA biology [4, 10].

361



362 **Materials and methods**

363 **Plasmids, strains and growth conditions**

364 For cloning of plasmids and GST pulldown experiments, *E. coli* Top10 cells (Life  
365 Technologies, Carlsbad, CA, USA) and *E. coli* Rosetta2 pLysS (Merck 71403) were used,  
366 respectively. Transformation, cultivation and plasmid isolation were conducted using standard  
367 techniques. All *U. maydis* strains are derivatives of AB33, in which hyphal growth can be  
368 induced [18]. Yeast-like cells were incubated in complete medium (CM) supplemented with  
369 1% glucose, whereas hyphal growth was induced by changing to nitrate minimal medium  
370 (NM) supplemented with 1% glucose, both at 28°C [18]. Detailed growth conditions and  
371 cloning strategies for *U. maydis* are described elsewhere [8, 38, 39]. All plasmids were  
372 verified by sequencing. Strains were generated by transforming progenitor strains with  
373 linearised plasmids. Successful integration of constructs was verified by diagnostic PCR and  
374 by Southern blot analysis [38]. For ectopic integration, plasmids were linearised with SspI  
375 and targeted to the *ip<sup>S</sup>* locus [40]. Wild-type strain UM521 genomic DNA was used as a  
376 template for PCR amplifications of ORFs, unless otherwise stated. Yeast two-hybrid tests  
377 were carried out using *S. cerevisiae* strain AH109 (Clontech Laboratories Inc., Mountain  
378 View, CA, USA). A detailed description of all plasmids and strains is given in Appendix  
379 Tables S1 to S6. Sequences are available upon request.

380 **Microscopy, image processing and image analysis**

381 Laser-based epifluorescence-microscopy was performed on a Zeiss Axio Observer.Z1  
382 equipped with CoolSNAP HQ2 CCD (Photometrics, Tuscon, AZ, USA) and ORCA-Flash4.0  
383 V2+ CMOS (Hamamatsu Photonics Deutschland GmbH, Geldern, Germany) cameras. For  
384 excitation we used a VS-LMS4 Laser-Merge-System (Visitron Systems, Puchheim, Germany)  
385 that combines solid state lasers for excitation of Gfp (488 nm at 50 or 100 mW) and  
386 Rfp/mCherry (561 nm at 50 or 150 mW).

Jankowski, Pohlmann et al.

387 For the quantification of unipolar hyphal growth, cells were grown in 20 ml cultures to an  
388 OD<sub>600</sub> of 0.5 and hyphal growth was induced. After 6 hours, more than 100 cells per  
389 experiment were imaged and analysed for growth behaviour. Cells were scored for unipolar  
390 and bipolar growth as well for formation of empty sections. At least three independent  
391 experiments were conducted. For statistical analysis, the rate of bipolarity was investigated by  
392 using unpaired two-tailed Student's t-test.

393 For analysis of signal number and velocity, we recorded videos with an exposure time of  
394 150 ms and 150 frames taken. All videos and images were processed and analysed using  
395 Metamorph (Version 7.7.0.0, Molecular Devices, Seattle, IL, USA). Kymographs were  
396 generated using a built-in plugin and processively moving particles were counted manually.  
397 The average velocity was determined by quantifying processive signals (movement > 5  $\mu\text{m}$ ).  
398 Data points represent means from three independent experiments (n = 3) with mean of means  
399 (red line) and s.e.m. For each experiment at least 30 signals per hypha were analysed out of  
400 10 hyphae per strain.

401 For quantification of Cdc3 fluorescence intensity line-scans were conducted in a region  
402 of 10  $\mu\text{m}$  from hyphal tips. Relative fluorescence intensities of 30 hyphal tips per strain were  
403 averaged. Data points represent means from three independent experiments (n = 3) with mean  
404 of means (red line) and s.e.m.. Colocalization studies of dynamic processes were carried out  
405 by using a two-channel imaging system (DV2, Photometrics, Tucson, AZ, USA) [16, 41].

#### 406 **RNA live imaging, FM4-64 staining and benomyl treatment**

407 RNA imaging in living cells was conducted by using the  $\lambda\text{N}$ -based green-RNA method  
408 described previously [12, 14]. For RNA visualization of *ubi1* and *rho3*  $\lambda\text{N}$  was fused to three  
409 copies of enhanced Gfp and 16 copies of the boxB loop were inserted in the 3' UTR of the  
410 respective mRNAs. Expression was driven either by the native *ubi1* promoter or in case of  
411 *rho3* by the constitutively active promoter P<sub>otef</sub>. For RNA visualization of *cdc3* and *cdc12* a

412 modified  $\lambda$ N ( $\lambda$ N\*) was fused to three copies of enhanced Gfp and 16 copies of the boxB loop  
413 were inserted in the 3' UTR of the respective mRNAs. Both constructs were under the control  
414 of the constitutive active promoter  $P_{otef}$ . Three independent experiments ( $n = 3$ ) were  
415 conducted with at least 10 hyphae per strain. Statistical tests were performed using Graphpad  
416 Prism5 (version 5.00; Graphpad Software, La Jolla, CA, USA). A detailed protocol for  
417 subsequent data analysis was described elsewhere [14]. For staining of cells with FM4-64, a 1  
418 ml sample of hyphal cells was labelled with 0.8  $\mu$ M FM4-64 (Thermo Fisher, Waltham, MA,  
419 USA). After incubation for 1 min at room temperature, the labelled cells were analysed by  
420 fluorescence microscopy. For benomyl treatment, a 1 ml sample of hyphal cells was treated  
421 with 20  $\mu$ M benomyl (Sigma-Aldrich, Taufkirchen, Germany). After incubation for 30 min at  
422 room temperature with agitation samples were analysed by microscopy.

#### 423 **Fluorimetric measurement of chitinolytic activity**

424 Chitinolytic activity measurements of *U. maydis* cells were carried out as described elsewhere  
425 [16, 19]. Briefly, *U. maydis* cell suspensions were grown to an  $OD_{600}$  of 0.5. The culture was  
426 divided in half, yeast-like growing cells were measured directly while activity of hyphae was  
427 measured 6 h after induction of hyphal growth. 30  $\mu$ l of the culture were mixed with 70  $\mu$ l  
428 0.25  $\mu$ M 4-Methylumbelliferyl- $\beta$ -D-N,N',N''-triacetylchitotrioside (MUC, Sigma-Aldrich,  
429 Taufkirchen, Germany), a fluorogenic substrate for chitinolytic activity. After incubation for 1  
430 h, the reaction was stopped by addition of 200  $\mu$ l 1M  $Na_2CO_3$ , followed by detection of the  
431 fluorescent product with the fluorescence spectrometer Infinite M200 (Tecan Group Ltd.,  
432 Mannedorf, Switzerland) using an excitation and emission wavelength of 360 nm and 450  
433 nm, respectively. Chitinase activity was set and reported in relation to AB33 (wt) activity.  
434 Five independent biological experiments were performed with three technical replicates per  
435 strain.

436 **Yeast two-hybrid analysis**

437 The yeast two-hybrid analyses were carried out as described elsewhere [16]. Briefly, using the  
438 two-hybrid system Matchmaker 3 from Clontech, strain AH109 was co-transformed with  
439 derivatives of pGBKT7-DS and pGADT7-Sfi (Appendix Table S4) and cells were grown on  
440 synthetic dropout (SD) plates without leucine and tryptophan at 28° C for 4 days.  
441 Subsequently, colonies were patched on SD plates without leucine and tryptophan (control) or  
442 on SD plates without leucine, tryptophan, histidine and adenine (selection). Plates were  
443 incubated at 28°C for 3 days to test for growth under selection condition. For qualitative plate  
444 assays cells were cultivated in SD without leucine and tryptophan to OD<sub>600</sub> of 0.5 and  
445 successively diluted with sterile water in four steps at 1:5 each. 4 µl were spotted on control  
446 as well as selection plates and incubated at 28° C for 3 days. Colony growth was documented  
447 with a LAS 4000 imaging system (GE Healthcare Life Sciences, Little Chalfont, UK).

448 **Protein extracts and Western blot analysis**

449 *U. maydis* hyphae were harvested 6 hours post induction (h.p.i.) by centrifugation (7546 x g,  
450 10 minutes) and resuspended in 2 ml of either urea buffer (8 M Urea, 50 mM Tris/HCl pH8;  
451 Fig EV2E and Fig EV3F, right panel) or l-arginine rich buffer (0.4 M sorbitol; 5 % glycerol;  
452 50 mM Tris/HCl pH7.4; 300 mM NaCl; 1 mM EDTA; 0.5% Nonidet P-40; 0.1% SDS; 72.5  
453 mM l-arginine, Fig EV3C and Fig EV3F, left panel) supplemented with protease inhibitors (1  
454 tablet of complete protease inhibitor per 25 ml, Roche, Mannheim, Germany; 1 mM DTT; 0.1  
455 M PMSF; 0.5 M benzamidine). Cells were lysed in a Retsch ball mill (MM400; Retsch, Haan,  
456 Germany) while keeping samples constantly frozen using liquid nitrogen. 2 ml cell  
457 suspension per grinding jar with two grinding balls (d = 12 mm) were agitated for 10 minutes  
458 at 30 Hz. Protein concentrations were measured by Bradford assay (Bio-Rad, Munich,  
459 Germany) and samples were adjusted to equal amounts. For Western Blot analysis, protein  
460 samples were supplemented with Laemmli buffer and heated to 60°C-80°C for 10 minutes,  
461 resolved by 8% SDS-PAGE and transferred to a nitrocellulose membrane (GE Healthcare,

Jankowski, Pohlmann et al.

462 Munich, Germany) by semi-dry blotting. Membranes were probed with  $\alpha$ -Gfp (Roche,  
463 Freiburg, Germany) and  $\alpha$ -actin (MP Biomedicals, Eschwege, Germany) antibodies. As  
464 secondary antibody a mouse IgG HRP conjugate was used (Promega, Madison, WI, USA).  
465 Detection was carried out by using AceGlow (VWR Peqlab, Erlangen, Germany).

#### 466 **GST pull down experiments**

467 Derivatives of plasmids pGEX and pET15B (Appendix Table S5) were transformed into *E.*  
468 *coli* Rosetta2 pLysS (Merck 71403). Overnight cultures were diluted 1:50 in a final volume of  
469 50 ml. Protein expression was induced with 1mM IPTG for 4 h at 28°C. Cells were pelleted,  
470 resuspended in 10 ml lysis buffer and lysed by sonication. Cell lysate was centrifuged at  
471 16,000 g for 15 minutes and the supernatant was transferred to the fresh microcentrifuge  
472 tubes. 50  $\mu$ l glutathione beads (GE Healthcare) were transferred to a new 1.5 ml  
473 microcentrifuge tube and washed 3 times with 1 ml lysis buffer (20 mM Tris-Cl, pH 7.5; 200  
474 mM NaCl; 1mM EDTA, pH 8.0; 0.5 % Nonidet P-40; 1 tablet complete protease inhibitor per  
475 50ml, Roche, Mannheim, Germany). For each pulldown, 1 ml of supernatant of GST-tagged  
476 protein was added to the washed beads, incubated for 1 h at 4° C and subsequently washed 5  
477 times with 1 ml lysis buffer. 1 ml supernatant containing His-tagged Upa2 variant was added  
478 directly to the washed GST bead and incubated for 1 h at 4° C and subsequently washed 5  
479 times with lysis buffer. The beads were boiled for 6 min at 99° C in 100  $\mu$ l of 1x Laemmli  
480 buffer. 10  $\mu$ l of each GST-pulldown fraction was analysed by SDS-PAGE and Coomassie  
481 blue (CBB R250) staining. 1 ml supernatant containing Upa2 variant was added directly to  
482 the washed Ni-NTA (Macherey-Nagel) bead, incubated for 1 h at 4° C and subsequently  
483 washed 5 times with 1 ml lysis buffer. 20  $\mu$ l of each Upa2 variants were loaded on control  
484 lanes in SDS PAGE as an input. Note, that the input fraction “H” shows Ni-NTA precipitated  
485 Upa2, which could not be visualized before enrichment.

486 For Western blotting protein samples were resolved by 10% SDS-PAGE and transferred  
487 to a PVDF membrane (GE Healthcare) by semi-dry blotting. Western blot analysis was  
488 performed with  $\alpha$ -GST (Sigma G7781),  $\alpha$ -His (Sigma H1029).  $\alpha$ -Rabbit IgG HRP conjugate  
489 (Promega W4011),  $\alpha$ -mouse IgG HRP conjugate (Promega W4021) were used as secondary  
490 antibodies. Activity was detected using the AceGlow blotting detection system (VWR Peqlab,  
491 Erlangen, Germany).

#### 492 **Phylogenetic analysis and bioinformatics**

493 Sequence data for *U. maydis* genes was retrieved from the PEDANT database  
494 (<http://pedant.gsf.de/>). Accession numbers of *U. maydis* genes used in this study: *upa2*  
495 (UMAG\_10350), *rrm4* (UMAG\_10836), *pab1* (UMAG\_03494), *upa1* (UMAG\_12183),  
496 *rab5a* (UMAG\_10615) and *cdc3* (UMAG\_10503). Orthologs were identified using fungiDB  
497 [42, 43], Ensembl Fungi [44] and NCBI blastp tool [45]. Sequences alignments were  
498 performed with ClustalX (version 2.0.12) [46]. Domains were predicted using SMART [47,  
499 48], conserved domain database from the NCBI (CDD) [49] and active search using  
500 ScanProsite [50]. The coiled coil dimerisation domain was predicted using the Interpro  
501 COILS program [51]. The phylogenetic tree is based on the NCBI taxonomy and was created  
502 using phyloT online tool ([phylot.biobyte.de](http://phylot.biobyte.de)). The lengths of the lines do not represent  
503 evolutionary distance. The accession numbers for the proteins can be found in Appendix  
504 Table S7).

505 Intrinsically disordered regions were predicted using the PONDR VL3-BA algorithm  
506 ([www.pondr.com](http://www.pondr.com), Molecular Kinetics, Inc., IN, USA). VL3-BA is a feedforward neural  
507 network predictor generating outputs between 0 and 1 which are smoothed over a sliding  
508 window of 9 amino acids. Regions with values of 0.5 or above are considered disordered and  
509 are marked in red, while peptide regions with values lower than 0.5 are considered ordered  
510 and are marked in blue.

511

512 **Acknowledgements**

513 We acknowledge Drs. A. Brachmann, J. Béthune, K. Zarnack and lab members for discussion  
514 and reading of the manuscript. We are grateful to U. Gengenbacher for excellent technical  
515 assistance. The work was funded by grants from the Deutsche Forschungsgemeinschaft to MF  
516 (FE448/5-2 DFG-FOR1334; FE448/10-1 DFG-FOR2333; DFG-CRC1208 project number  
517 267205415 and CEPLAS EXC1028).

518

519 **Author contributions**

520 SJ, TP, SB and MF designed this study and analysed the data. SJ and TP contributed equally  
521 to the genetic and cell biological analysis of Upa2. SB carried out the initial cell biological  
522 characterisation of Upa2. KM and SZ performed RNA live imaging experiments. SKD  
523 analysed the PAM2/MLLE interaction *in vitro*. MF, SJ and TP drafted and revised the  
524 manuscript with input from all co-authors. MF and TP directed the project.

525

526 **Conflict of interest**

527 The authors declare that they have no conflict of interest.

528

529 **References**

- 530 1. Martin KC, Ephrussi A (2009) mRNA localization: gene expression in the spatial  
531 dimension. *Cell* **136**: 719-730
- 532 2. Eliscovich C, Singer RH (2017) RNP transport in cell biology: the long and winding  
533 road. *Current opinion in cell biology* **45**: 38-46
- 534 3. Edelmann FT, Schlundt A, Heym RG, Jenner A, Niedner-Boblenz A, Syed MI, Paillart  
535 JC, Stehle R, Janowski R, Sattler M, *et al.* (2017) Molecular architecture and dynamics of

- 536 *ASH1* mRNA recognition by its mRNA-transport complex. *Nat Struct Mol Biol* **24**: 152-  
537 161
- 538 4. Niessing D, Jansen RP, Pohlmann T, Feldbrügge M (2018) mRNA transport in fungal top  
539 models. *Wiley interdisciplinary reviews RNA* **9**: e1453
- 540 5. Mofatteh M, Bullock SL (2017) SnapShot: Subcellular mRNA localization. *Cell* **169**:  
541 178.e1
- 542 6. Vollmeister E, Schipper K, Baumann S, Haag C, Pohlmann T, Stock J, Feldbrügge M  
543 (2012) Fungal development of the plant pathogen *Ustilago maydis*. *FEMS Microbiol Rev*  
544 **36**: 59-77
- 545 7. Haag C, Steuten B, Feldbrügge M (2015) Membrane-coupled mRNA trafficking in fungi.  
546 *Annu Rev Microbiol* **69**: 265-281
- 547 8. Baumann S, Pohlmann T, Jungbluth M, Brachmann A, Feldbrügge M (2012) Kinesin-3  
548 and dynein mediate microtubule-dependent co-transport of mRNPs and endosomes. *J*  
549 *Cell Sci* **125**: 2740-2752
- 550 9. Schuster M, Kilaru S, Fink G, Collemare J, Roger Y, Steinberg G (2011) Kinesin-3 and  
551 dynein cooperate in long-range retrograde endosome motility along a non-uniform  
552 microtubule array. *Mol Biol Cell* **22**: 3645-3657
- 553 10. Haag C, Pohlmann T, Feldbrugge M (2017) The ESCRT regulator Did2 maintains the  
554 balance between long-distance endosomal transport and endocytic trafficking. *PLoS*  
555 *Genet* **13**: e1006734
- 556 11. Higuchi Y, Ashwin P, Roger Y, Steinberg G (2014) Early endosome motility spatially  
557 organizes polysome distribution. *J Cell Biol* **204**: 343-357
- 558 12. Baumann S, König J, Koepke J, Feldbrügge M (2014) Endosomal transport of septin  
559 mRNA and protein indicates local translation on endosomes and is required for correct  
560 septin filamentation. *EMBO Rep* **15**: 94-102



- 561 13. König J, Baumann S, Koepke J, Pohlmann T, Zarnack K, Feldbrügge M (2009) The  
562 fungal RNA-binding protein Rrm4 mediates long-distance transport of *ubi1* and *rho3*  
563 mRNAs. *EMBO J* **28**: 1855-1866
- 564 14. Zander S, Baumann S, Weidtkamp-Peters S, Feldbrügge M (2016) Endosomal assembly  
565 and transport of heteromeric septin complexes promote septin cytoskeleton formation. *J*  
566 *Cell Sci* **129**: 2778-2792
- 567 15. Olgeiser L, Haag C, Boerner S, Ule J, Busch A, Koepke J, König J, Feldbrügge M,  
568 Zarnack K (2019) The key protein of endosomal mRNP transport Rrm4 binds  
569 translational landmark sites of cargo mRNAs. . *EMBO Rep*: e46588
- 570 16. Pohlmann T, Baumann S, Haag C, Albrecht M, Feldbrügge M (2015) A FYVE zinc  
571 finger domain protein specifically links mRNA transport to endosome trafficking. *eLife*  
572 **4**: e06041
- 573 17. Becht P, König J, Feldbrügge M (2006) The RNA-binding protein Rrm4 is essential for  
574 polarity in *Ustilago maydis* and shuttles along microtubules. *J Cell Sci* **119**: 4964-4973
- 575 18. Brachmann A, Weinzierl G, Kämper J, Kahmann R (2001) Identification of genes in the  
576 bW/bE regulatory cascade in *Ustilago maydis*. *Mol Microbiol* **42**: 1047-1063
- 577 19. Koepke J, Kaffarnik F, Haag C, Zarnack K, Luscombe NM, König J, Ule J, Kellner R,  
578 Begerow D, Feldbrügge M (2011) The RNA-binding protein Rrm4 is essential for  
579 efficient secretion of endochitinase Cts1. *Mol Cell Proteom* **10**: M111.011213 1-15
- 580 20. Müller J, Pohlmann T, Feldbrügge M (2019) Core components of endosomal mRNA  
581 transport are evolutionarily conserved in fungi. *Fungal Genet Biol* **126**: 12-16
- 582 21. Hardwick SW, Chan VS, Broadhurst RW, Luisi BF (2011) An RNA degradosome  
583 assembly in *Caulobacter crescentus*. *Nucleic Acids Res* **39**: 1449-1459
- 584 22. Hardwick SW, Gubbey T, Hug I, Jenal U, Luisi BF (2012) Crystal structure of  
585 *Caulobacter crescentus* polynucleotide phosphorylase reveals a mechanism of RNA  
586 substrate channelling and RNA degradosome assembly. *Open biology* **2**: 120028

- 587 23. Baumann S, Takeshita N, Grün N, Fischer R, Feldbrügge M (2015) *Live cell imaging of*  
588 *endosomal trafficking in fungi*. In *Methods in Mol Biol: Membrane trafficking*, Tang BL  
589 (ed) pp 347-363. New York: Springer
- 590 24. Kozlov G, Trempe JF, Khaleghpour K, Kahvejian A, Ekiel I, Gehring K (2001) Structure  
591 and function of the C-terminal PABC domain of human poly(A)-binding protein. *Proc*  
592 *Natl Acad Sci U S A* **98**: 4409-4413
- 593 25. Su H, Meng S, Lu Y, Trombly MI, Chen J, Lin C, Turk A, Wang X (2011) Mammalian  
594 hyperplastic discs homolog EDD regulates miRNA-mediated gene silencing. *Mol Cell*  
595 **43**: 97-109
- 596 26. Xie J, Kozlov G, Gehring K (2014) The "tale" of poly(A) binding protein: the MLLE  
597 domain and PAM2-containing proteins. *Biochim Biophys Acta* **1839**: 1062-1068
- 598 27. Kozlov G, Gehring K (2010) Molecular basis of eRF3 recognition by the MLLE domain  
599 of poly(A)-binding protein. *PLoS One* **5**: e10169
- 600 28. Ezzeddine N, Chang TC, Zhu W, Yamashita A, Chen CY, Zhong Z, Yamashita Y, Zheng  
601 D, Shyu AB (2007) Human TOB, an antiproliferative transcription factor, is a poly(A)-  
602 binding protein-dependent positive regulator of cytoplasmic mRNA deadenylation.  
603 *Molecular and cellular biology* **27**: 7791-7801
- 604 29. Groemping Y, Lapouge K, Smerdon SJ, Rittinger K (2003) Molecular basis of  
605 phosphorylation-induced activation of the NADPH oxidase. *Cell* **113**: 343-355
- 606 30. Chekulaeva M, Mathys H, Zipprich JT, Attig J, Colic M, Parker R, Filipowicz W (2011)  
607 miRNA repression involves GW182-mediated recruitment of CCR4-NOT through  
608 conserved W-containing motifs. *Nat Struct Mol Biol* **18**: 1218-1226
- 609 31. Shiber A, Doring K, Friedrich U, Klann K, Merker D, Zedan M, Tippmann F, Kramer G,  
610 Bukau B (2018) Cotranslational assembly of protein complexes in eukaryotes revealed by  
611 ribosome profiling. *Nature* **561**: 268-272

Jankowski, Pohlmann et al.

- 612 32. Falk J, Konopacki FA, Zivraj KH, Holt CE (2014) Rab5 and Rab4 regulate axon  
613 elongation in the *Xenopus* visual system. *J Neurosci* **34**: 373-391
- 614 33. Konopacki FA, Wong HH, Dwivedy A, Bellon A, Blower MD, Holt CE (2016) ESCRT-  
615 II controls retinal axon growth by regulating DCC receptor levels and local protein  
616 synthesis. *Open biology* **6**: 150218
- 617 34. Yang Y, Chou HL, Crofts AJ, Zhang L, Tian L, Washida H, Fukuda M, Kumamaru T,  
618 Oviedo OJ, Starkenburg S, *et al.* (2018) Selective sets of mRNAs localize to extracellular  
619 paramural bodies in the rice *glup6* mutant line. *J Exp Bot* **69**: 5045-5058
- 620 35. Cioni JM, Lin JQ, Holtermann AV, Koppers M, Jakobs MAH, Azizi A, Turner-Bridger  
621 B, Shigeoka T, Franze K, Harris WA, *et al.* (2019) Late endosomes act as mRNA  
622 translation platforms and sustain mitochondria in axons. *Cell* **176**: 56-72 e15
- 623 36. Rossoll W, Bassell GJ (2019) Crosstalk of local translation and mitochondria: powering  
624 plasticity in axons and dendrites. *Neuron* **101**: 204-206
- 625 37. Béthune J, Jansen RP, Feldbrügge M, Zarnack K (2018) Membrane-associated RNA-  
626 binding proteins orchestrate organelle-coupled translation *Trends in cell biology* **29**: 178-  
627 188
- 628 38. Brachmann A, König J, Julius C, Feldbrügge M (2004) A reverse genetic approach for  
629 generating gene replacement mutants in *Ustilago maydis*. *Mol Gen Genom* **272**: 216-226
- 630 39. Terfrüchte M, Joehnk B, Fajardo-Somera R, Braus G, Riquelme M, Schipper K,  
631 Feldbrügge M (2014) Establishing a versatile Golden Gate cloning system for genetic  
632 engineering in fungi. *Fungal Genet Biol* **62**: 1-10
- 633 40. Loubradou G, Brachmann A, Feldbrügge M, Kahmann R (2001) A homologue of the  
634 transcriptional repressor Ssn6p antagonizes cAMP signalling in *Ustilago maydis*. *Mol*  
635 *Microbiol* **40**: 719-730

Jankowski, Pohlmann et al.

- 636 41. Baumann S, Zander S, Weidtkamp-Peters S, Feldbrügge M (2016) *Live cell imaging of*  
637 *septin dynamics in Ustilago maydis*. In *Methods in Cell Biol: Septins*, Gladfelter AS (ed)  
638 pp 143-159. Elsevier Inc.
- 639 42. Stajich JE, Harris T, Brunk BP, Brestelli J, Fischer S, Harb OS, Kissinger JC, Li W,  
640 Nayak V, Pinney DF, *et al.* (2012) FungiDB: an integrated functional genomics database  
641 for fungi. *Nucleic Acids Res* **40**: D675-681
- 642 43. Basenko EY, Pulman JA, Shanmugasundram A, Harb OS, Crouch K, Starns D,  
643 Warrenfeltz S, Aurrecochea C, Stoeckert CJ, Jr., Kissinger JC, *et al.* (2018) FungiDB:  
644 An Integrated Bioinformatic Resource for Fungi and Oomycetes. *J Fungi* **4**: e39
- 645 44. Kersey PJ, Allen JE, Allot A, Barba M, Boddu S, Bolt BJ, Carvalho-Silva D, Christensen  
646 M, Davis P, Grabmueller C, *et al.* (2018) Ensembl Genomes 2018: an integrated omics  
647 infrastructure for non-vertebrate species. *Nucleic Acids Res* **46**: D802-D808
- 648 45. Altschul SF, Gish W, Miller W, Myers EW, Lipman DJ (1990) Basic local alignment  
649 search tool. *J Mol Biol* **215**: 403-410
- 650 46. Larkin MA, Blackshields G, Brown NP, Chenna R, McGettigan PA, McWilliam H,  
651 Valentin F, Wallace IM, Wilm A, Lopez R, *et al.* (2007) Clustal W and Clustal X version  
652 2.0. *Bioinformatics* **23**: 2947-2948
- 653 47. Schultz J, Milpetz F, Bork P, Ponting CP (1998) SMART, a simple modular architecture  
654 research tool: identification of signaling domains. *Proc Natl Acad Sci U S A* **95**: 5857-  
655 5864
- 656 48. Letunic I, Bork P (2018) 20 years of the SMART protein domain annotation resource.  
657 *Nucleic Acids Res* **46**: D493-D496
- 658 49. Marchler-Bauer A, Bo Y, Han L, He J, Lanczycki CJ, Lu S, Chitsaz F, Derbyshire MK,  
659 Geer RC, Gonzales NR, *et al.* (2017) CDD/SPARCLE: functional classification of  
660 proteins via subfamily domain architectures. *Nucleic Acids Res* **45**: D200-D203

Jankowski, Pohlmann et al.

- 661 50. de Castro E, Sigrist CJ, Gattiker A, Bulliard V, Langendijk-Genevaux PS, Gasteiger E,  
662 Bairoch A, Hulo N (2006) ScanProsite: detection of PROSITE signature matches and  
663 ProRule-associated functional and structural residues in proteins. *Nucleic Acids Res* **34**:  
664 W362-5
- 665 51. Lupas A, Van Dyke M, Stock J (1991) Predicting coiled coils from protein sequences.  
666 *Science* **252**: 1162-1164
- 667 52. Steinberg G, Fuchs U (2004) The role of microtubules in cellular organization and  
668 endocytosis in the plant pathogen *Ustilago maydis*. *J Microsc* **214**: 114-123
- 669

670 **Figures 1-7 and Figure legends**

671 **Figure 1. Upa2 contains multiple PAM2 motifs for interaction with Pab1.**

672 (A) Schematic representation of the MLLE domain-containing proteins Rrm4 and Pab1 as  
673 well as the PAM2 motif-containing proteins Upa1 and Upa2 drawn to scale (bar, 200 amino  
674 acids; green, RRM domain; blue, MLLE domain; orange, PAM2 motif; dark blue, PAM2-like  
675 motif; dark grey, Ankyrin repeats; light blue, FYVE domain; lilac, RING domain; yellow,  
676 coiled coil region) (B) Comparison of PAM2 sequences found in Upa2 (accession number  
677 UMAG\_10350) with those of human proteins such as PAIP1 (accession number  
678 NP\_006442.2), PAIP2 (accession number CAG38520.1), eRF3B (accession number  
679 CAB91089.1) and ATX2 (accession number NP\_002964.3). (C) Two-hybrid analysis with  
680 schematic representation of protein variants tested on the left. Yeast cultures were serially  
681 diluted 1:5 (decreasing colony forming units, cfu) and spotted on respective growth plates  
682 controlling transformation and assaying reporter gene expression (see Materials and  
683 methods). (D) GST co-purification experiments with components expressed in *E. coli*: MLLE  
684 domain of Pab1 fused to GST and N-terminal His<sub>6</sub>-tagged versions of Upa2 (amino acids  
685 834–1216; orange rectangles indicate PAM2 motif 1, 2 and 3; black rectangles mark  
686 mutations; 43 kDa). Interaction studies were performed with the soluble fraction of protein  
687 extracts from *E. coli* to demonstrate specific binding. After GST affinity chromatography  
688 proteins were eluted (lanes marked with "E"; G, input of GST-MLLE<sup>Pab1</sup> and H, Ni-NTA  
689 precipitated His<sub>6</sub>-Upa2). Note that the Upa2 variants were enriched in the eluate due to the  
690 pull down by MLLE<sup>Pab1</sup>. (E) Two-hybrid analysis of the coiled coil region of Upa2 (amino  
691 acids 1712-2121) fused to binding domain (BD) and activation domain (AD) of the Gal4  
692 transcription factor (design as in C).

693

694 **Figure 2. Loss of Upa2 causes defects in hyphal growth.**

695 (A) Growth of AB33 derivatives in the hyphal form (6 h.p.i.; growth direction is marked by  
696 arrows; n, nucleus; asterisks, basal septa). (B) Quantification of hyphal growth (6 h.p.i):  
697 unipolarity, bipolarity and septum formation were quantified (error bars, s.e.m.; n = 3  
698 independent experiments, for each experiment >100 hyphae were counted per strain; note that  
699 septum formation is given relative to the values of unipolar or bipolar hyphae set to 100%).  
700 For statistical analysis, the percentage of bipolarity was investigated by using unpaired two-  
701 tailed Student's t-test. Three independent experiments (n = 3) were conducted with at least  
702 100 hyphae per strain. (C) Schematic representation of orthologues of Rrm4, Upa2 and Upa1  
703 in different basidiomycetes. The phylogenetic tree was generated using the phyloT tool using  
704 the NCBI taxonomy (no evolutionary distances): U.m.: *Ustilago maydis*, U.h.: *Ustilago*  
705 *hordei*; U.b.: *Ustilago bromivora*; S.r.: *Sporisorium reilianum*; S.sc.: *Sporisorium*  
706 *scitamineum*, M.a.: *Moesziomyces antarcticus*, M.p.: *Melanopsichium pennsylvanicum*, T.t.:  
707 *Thecaphora thlaspeos*; M.g.: *Malassezia globosa*; C.n.: *Cryptococcus neoforman var*  
708 *neoformanss*; A.o.: *Armillaria ostoyae*; C.c.: *Coprinopsis cinerea*; P.s.: *Punctularia*  
709 *strigosozonata*; S.i.: *Serendipita indica*; T.v.: *Trametes versicolor*; P.c.: *Phanerochaete*  
710 *carnosa*. \* Bioinformatic tools predict weak RRM domains and a non-functional MLLE  
711 domain in C.n. Rrm4. \*\* A.o. Upa1 contains a predicted transmembrane domain instead of a  
712 RING domain; \*\*\* S.i. Upa1 was manually assembled from two consecutive ORFs.  
713 Accession numbers are listed in Appendix Table S7.

714

715 **Figure 3. Bidirectional movement of Upa2 on Rrm4-positive endosomes.**

716 (A) Micrographs (inverted fluorescence image; size bar, 10  $\mu\text{m}$ ) and corresponding  
717 kymographs of AB33 hyphae (6 h.p.i.) expressing Upa2-Gfp, Rrm4-Gfp or Pab1-Gfp (arrow  
718 length on the left and bottom indicate time and distance, respectively). Bidirectional  
719 movement is visible as diagonal lines (yellow arrowheads; n, nucleus; Video EV1). After  
720 addition of the microtubule inhibitor benomyl static signals are seen as vertical lines (red  
721 arrowheads; Video EV1). (B) Processive signals per 10  $\mu\text{m}$  of hyphal length (data points  
722 representing mean from  $n = 3$  independent experiments, with mean of means, red line, and  
723 s.e.m.; unpaired two-tailed Student's t-test, for each experiment at least 10 hyphae were  
724 analysed per strain). (C) Velocity of fluorescent signals (velocity of tracks with  $> 5 \mu\text{m}$   
725 processive movement; data points representing means from  $n = 3$  independent experiments,  
726 with mean of means, red line, and s.e.m.; unpaired two-tailed Student's t-test; for each  
727 experiment at least 30 signals per hypha were analysed out of 10 hyphae per strain). (D)  
728 Kymographs of AB33 hyphae (6 h.p.i.) expressing pairs of red and green fluorescent proteins  
729 as indicated. Fluorescence signals were detected simultaneously using dual-view technology  
730 (arrow length as in A). Processive co-localising signals are marked by yellow arrowheads.  
731 Areas of static signals are indicated by red asterisks (Video EV2). (E) Percentage of  
732 processive signals exhibiting co-localisation for strains shown in D. Note, that due to the  
733 weaker red fluorescence only clearly detectable red fluorescent signals were analysed for co-  
734 localisation with processive green fluorescent signals (data points represent means set to 100%  
735 from  $n = 3$  independent experiments, with mean of means, red line, and s.e.m.; unpaired two-  
736 tailed Student's t-test; for each experiment 6 hyphae were analysed per strain).



737

738 **Figure 4. Endosomal localisation of Upa2 is mRNA-dependent.**

739 (A) Micrographs (inverted fluorescence image; size bar, 10  $\mu\text{m}$ ) and corresponding  
740 kymographs of AB33 hyphae (6 h.p.i.). Genetic background as indicated above (arrow length  
741 on the left and bottom indicate time and distance, respectively). Bidirectional movement is  
742 visible as diagonal lines (yellow arrowheads; Videos EV3-EV5). (B) Processive signals per  
743 10  $\mu\text{m}$  of hyphal length (data points representing means from  $n = 3$  independent experiments,  
744 with mean of means, red line, and s.e.m.; unpaired two-tailed Student's t-test, for each  
745 experiment at least 10 hyphae were analysed per strain). (C) Kymographs of AB33 hyphae (6  
746 h.p.i.) expressing pairs of red and green fluorescent proteins as indicated. Fluorescence  
747 signals were detected simultaneously using dual-view technology (arrow length as in A).  
748 Processive co-localising signals are marked by yellow arrowheads (Videos EV6-EV7). (D)  
749 Processive signals per 10  $\mu\text{m}$  of hyphal length (data points representing means from  $n = 3$   
750 independent experiments; with mean of means, red line, and s.e.m.; unpaired two-tailed  
751 Student's t-test, for each experiment at least 10 hyphae were analysed per strain).

752

753 **Figure 5. Upa2 carries a functional important effector domain at the N-terminus and a**  
754 **C-terminal GWW motif for endosomal localisation.**

755 (A) Growth of AB33 derivatives in the hyphal form (6 h.p.i.; growth direction is marked by  
756 arrows; asterisks, basal septa; n, nucleus; size bar 10  $\mu$ m). (B) Quantification of hyphal  
757 growth (6 h.p.i): unipolarity, bipolarity and septum formation were quantified (error bars,  
758 s.e.m.; n = 3 independent experiments, for each experiment >100 hyphae were counted per  
759 strain; note that septum formation is given relative to the values of unipolar or bipolar hyphae  
760 set to 100%). (C) Schematic representation of N-terminal truncations of Upa2 (orange, PAM2  
761 motif; light flow red, effector domain; yellow, dimerization domain; red, GWW; black,  
762 mutation in GWW). (D) Quantification of hyphal growth of N-terminally truncated Upa2  
763 mutants (6 h.p.i): unipolarity, bipolarity and septum formation were quantified (error bars,  
764 s.e.m.; n = 3 independent experiments, for each experiment >100 hyphae were counted per  
765 strain; note that septum formation is given relative to the values of unipolar or bipolar hyphae  
766 set to 100%). For statistical analysis, the percentage of bipolarity was investigated by using  
767 unpaired two-tailed Student's t-test. Three independent experiments (n = 3) were conducted  
768 with at least 100 hyphae per strain. (E) (F) Kymographs of AB33 hyphae (6 h.p.i.); genetic  
769 background as indicated (arrow length on the left and bottom indicate time and distance,  
770 respectively). Bidirectional movement is visible as diagonal lines (yellow arrowheads). (G)  
771 Comparison of the C-terminal amino acid sequence of Upa2 in *U. maydis* and related fungal  
772 species. Accession numbers can be found in Appendix Table S7. (H) Growth of AB33  
773 derivatives in the hyphal form (6 h.p.i.; growth direction is marked by arrows; asterisks, basal  
774 septa; size bar, 10  $\mu$ m) and corresponding kymographs of AB33 hyphae (6 h.p.i.). Genetic  
775 background as indicated in left bottom panel (arrow length on the left and bottom indicate

Jankowski, Pohlmann et al.

776 time and distance, respectively). Bidirectional movement is visible as diagonal lines (yellow  
777 arrowheads; Video EV8).

778

779 **Figure 6. Loss of Upa2 causes defects in the formation of endosomal mRNPs.**

780 (A) Micrographs of hyphal tips (inverted fluorescence image; size bar, 10  $\mu\text{m}$ ) and  
781 corresponding kymographs of AB33 hyphae (6 h.p.i.). Genetic background as indicated above  
782 (arrow length on the left and bottom indicate time and distance, respectively). Bidirectional  
783 movement is visible as diagonal lines (yellow arrowheads; size bar, 10  $\mu\text{m}$ ; Videos EV9-12).  
784 (B) Processive signals per 10  $\mu\text{m}$  of hyphal length (data points representing means from  $n = 3$   
785 independent experiments, with mean of means, red line, and s.e.m.; unpaired two-tailed  
786 Student's t-test. For each experiment at least 10 hyphae per strain were analysed. (C) Velocity  
787 of fluorescent signals (velocity of tracks with  $> 5 \mu\text{m}$  processive movement; data points  
788 representing means from  $n = 3$  independent experiments; with mean of means, red line, and  
789 s.e.m.; unpaired two-tailed Student's t-test, for each experiment at least 30 signals per hypha  
790 were analysed out of 10 hyphae per strain). (D) Micrographs of hyphae and corresponding  
791 kymographs of AB33 derivatives (8 h.p.i.). Genetic background as indicated above (arrow  
792 length on the left and bottom indicate time and distance, respectively). Bidirectional  
793 movement of mRNA is visible as diagonal lines (yellow arrowheads; size bar, 10  $\mu\text{m}$ ; Video  
794 EV13). (E) Number of particles per 100  $\mu\text{m}$  hypha (data points representing means from  $n = 3$   
795 independent experiments, with mean of means, red line, and s.e.m.; unpaired two-tailed  
796 Student's t-test, for each experiment at least 7 hyphae were analysed per strain). (F) Range of  
797 movement of motile mRNAs (red line, median;  $n = 3$  independent experiments; unpaired  
798 Student's t-test). (G) Micrographs of hyphal tips (inverted fluorescence image; size bar, 10  
799  $\mu\text{m}$ ) and corresponding kymographs of AB33 hyphae (6 h.p.i.). Genetic background as  
800 indicated above (arrow length on the left and bottom indicate time and distance, respectively).  
801 Bidirectional movement is visible as diagonal lines (yellow arrowheads; size bar, 10 $\mu\text{m}$ ;  
802 Video EV14). (H) Heat maps of hyphal tips (6 h.p.i.) of AB33 derivatives expressing Cdc3-

Jankowski, Pohlmann et al.

803 Gfp comparing wild type (top panel) with *rrm4Δ* and *upa2Δ* strains (middle, bottom panel),  
804 indicating relative fluorescence intensity differences (maximum projection of z-stacks; size  
805 bar, 10 μm; red/yellow to green/blue, high to low intensities). **(I)** Relative fluorescence  
806 intensity (RFU), first 10 μm from hyphal tip (data points representing means from n = 3  
807 independent experiments, with mean of means, red line, and s.e.m.; unpaired two-tailed  
808 Student's t-test, for each experiment at least 10 hyphae were analysed per strain).

809

810 **Figure 7. Model depicting Upa2 as novel core component of endosomal mRNP**  
811 **transport.**

812 (A) Schematic drawing of infectious hypha (red, septin filaments with gradient; green,  
813 microtubules; grey circles with golden edge, transport endosomes with mRNPs and molecular  
814 motors attached; boxed region is enlarged in B). (B) Simplified view of known mRNP  
815 components at the cytoplasmic surface of transport endosome and a proposed interplay. Upa2  
816 harbours at least four different protein/protein interfaces: PAM2 motifs (orange), effector  
817 domain (light red), dimerisation domain (yellow), GWW motif (dark red). MLLE domains of  
818 Pab1 and Rrm4 are given in purple. Additional symbols: 5' cap, blue circle; mRNA as blue  
819 line with ORF (thick line); translating ribosome (grey) with nascent chain (black). Additional  
820 mRNP components that are predicted to interact with Upa2 are given as grey circles labelled  
821 X and Y (for further details, see text).

822 **Expanded View Figure Legends**

823

824 **Figure EV1. PAM2 motifs of Upa2 do not interact with MLLE domains of Rrm4.**

825 (A-B) Two-hybrid analysis with schematic representation of protein variants tested on the left  
826 (Colour scheme as in Fig 1A, C). Yeast cultures were serially diluted 1:5 (decreasing colony  
827 forming units, cfu) and spotted on respective growth plates controlling transformation and  
828 assaying reporter gene expression (see Materials and methods). (C) GST co-purification  
829 experiments with components expressed in *E. coli*: N-terminal His<sub>6</sub>-tagged versions of  
830 Upa2<sup>834-1216</sup>, Upa2<sup>834-1216\_mP23</sup>, and Upa2<sup>834-1216\_mP234</sup> (amino acids 834–1216; mutation in the  
831 PAM2 motifs number 2 and 3 as well as 2, 3 and 4, respectively) were tested for binding to  
832 the MLLE domain of Rrm4 (GST fusion to Rrm4<sup>720-792</sup> containing two MLLE domains). Lane  
833 “H” shows Ni-NTA precipitated His<sub>6</sub>-Upa2, lane “G” shows input of GST- Rrm4<sup>720-792</sup>). After  
834 GST affinity chromatography proteins were eluted (lanes marked with "E"). Interaction  
835 studies were performed with the soluble fraction of protein extracts from *E. coli* to  
836 demonstrate specific binding. (D) GST co-purification experiments as shown in B. The  
837 absence of Upa2<sup>834-1216</sup> interaction with the MLLE domains of Rrm4 was demonstrated in  
838 more sensitive Western blot experiments (used antibodies are given on the right). The three  
839 lanes on the right show all Upa2 versions after Ni-NTA precipitation.

840

841 **Figure EV2. Loss of Upa2 causes defects in secretion of chitinase Cts1.**

842 (A) Growth of yeast cells of indicated strains in liquid culture. (B) DIC images of yeast cells  
843 (size bar, 10  $\mu$ m). (C) Quantification of hyphal growth (6 h.p.i): unipolarity, bipolarity and  
844 septum formation were quantified (error bars, s.e.m.; n = 3 independent experiments, for each  
845 experiment >100 hyphae were counted per strain; note that septum formation is given relative  
846 to the values of unipolar or bipolar hyphae set to 100%). For statistical analysis, the  
847 percentage of bipolarity was investigated by using unpaired two-tailed Student's t-test. Three  
848 independent experiments (n = 3) were conducted with at least 10 hyphae per strain. (D)  
849 Relative chitinase activity mainly detecting chitinase Cts1 [16] in yeast (left) or hyphal form  
850 (right, error bars, s.e.m.; n = 5 independent experiments). For statistical analysis, the relative  
851 chitinolytic activity was tested by using unpaired two-tailed Student's t-test. Five independent  
852 experiments (n = 5) were conducted. (E) Western blot analysis demonstrating equal amounts  
853 of Upa2-Gfp versions using  $\alpha$ Gfp antibody (top panel). Expected molecular weight: Upa2-  
854 Gfp, 259 kDa; Pab1-Gfp, 98 kDa; Upa1-Gfp, 166 kDa. Note, that the molecular weight of  
855 Upa1-Gfp appeared larger in gel electrophoresis. Actin served as a loading control using  
856  $\alpha$ -actin antibody (bottom panel; expected size for actin, 42 kDa). Asterisks in  $\alpha$ Gfp panels  
857 mark putative degradation products of Gfp-tagged Upa2.



858

859 **Figure EV3. The GWW motif of Upa2 is essential for correct hyphal growth.**

860 (A) Kymographs of AB33 hyphae (6 h.p.i.) expressing versions of Upa2-Gfp with mutations  
861 in PAM2 motif as indicated (arrow length on the left and bottom indicate time and distance,  
862 respectively). Bidirectional movement is visible as diagonal lines (yellow arrowheads). (B)  
863 Quantification of hyphal growth (6 h.p.i): unipolarity, bipolarity and septum formation were  
864 quantified (error bars, s.e.m.; n = 3 independent experiments, for each experiment >100  
865 hyphae were counted per strain; note that septum formation is given relative to the values of  
866 unipolar or bipolar hyphae set to 100%). For statistical analysis, the percentage of bipolarity  
867 was investigated by using unpaired two-tailed Student's t-test. (C) Western blot analysis  
868 comparing protein amounts of functional and non-functional N-terminal truncations of Upa2-  
869 Gfp (Upa2<sup>339-2121</sup>-Gfp, 224 kDa; Upa2<sup>399-2121</sup>-Gfp, 217 kD, respectively) using  $\alpha$ Gfp antibody  
870 (top panel). Note, that the molecular weight appeared smaller in gel electrophoresis, most  
871 likely due to the use of a l-arginine buffer (see Materials and Methods). Actin served as a  
872 loading control using  $\alpha$ actin antibody (bottom panel; expected size for actin, 42 kDa).  
873 Asterisks in  $\alpha$ Gfp panels mark putative degradation products of Gfp-tagged Upa2. (D)  
874 Processive signals per 10  $\mu$ m of hyphal length (data points representing means from n = 3  
875 independent experiments, with mean of means, red line, and s.e.m.; unpaired two-tailed  
876 Student's t-test. for each experiment at least 10 hyphae were analysed per strain). (E) Velocity  
877 of fluorescent signals (velocity of tracks with > 5  $\mu$ m processive movement; data points  
878 representing means from n = 3 independent experiments; with mean of means, red line, and  
879 s.e.m.; unpaired two-tailed Student's t-test, for each experiment at least 30 signals per hypha  
880 were analysed out of 10 hyphae per strain). (F) Western Blot analysis comparing Upa2-Gfp  
881 versions with mutations in the C-terminal GWW motif (Upa2-Gfp, 259 kDa; Upa2<sup>mGWW</sup>-Gfp,  
882 258 kDa; Upa2<sup>1958-2121</sup>-Gfp, 46 kDa; Upa2<sup>1958-2121mGWW</sup>-Gfp, 46 kDa). Note that due to the

Jankowski, Pohlmann et al.

883 change of two tryptophans to alanine, the running behaviour of Upa2<sup>1958-2121mGWW</sup>-Gfp was  
884 different from Upa2<sup>1958-2121</sup>-Gfp. Actin served as a loading control using  $\alpha$ actin antibody  
885 (bottom panel; expected size for actin, 42 kDa). Asterisks in  $\alpha$ Gfp panels mark putative  
886 degradation products of Gfp-tagged Upa2. (G) Quantification of hyphal growth (6 h.p.i):  
887 unipolarity, bipolarity and septum formation were quantified (error bars, s.e.m.; n = 3  
888 independent experiments, for each experiment >100 hyphae were counted per strain; note that  
889 septum formation is given relative to the values of unipolar or bipolar hyphae set to 100%).  
890 For statistical analysis, the percentage of bipolarity was investigated by using unpaired two-  
891 tailed Student's t-test.

892 **Figure EV4. Loss of Upa2 causes aberrant bundle-like accumulation of Rrm4-Gfp.**

893 (A) Micrographs (inverted fluorescence image; size bar, 10  $\mu\text{m}$  of AB33 hyphae (6 h.p.i.)  
894 expressing Rrm4-Gfp (green arrowheads indicate bundle-like accumulation of Rrm4-Gfp).  
895 (B) Micrographs (inverted fluorescence image; size bar, 10  $\mu\text{m}$ ) of AB33 hyphae (6 h.p.i.)  
896 expressing Tub1-Gfp (ectopic expression of Tub1 fused N-terminally with Gfp) [52] or  
897 Rrm4-Gfp (green arrowheads indicate bundle-like accumulation of Rrm4-Gfp). Hyphae on  
898 the right were treated with the microtubule inhibitor benomyl. (C) Quantification of bundle  
899 structures in strains expressing Gfp-Tub1 or Rrm4-Gfp with and without treatment of  
900 microtubule inhibitor benomyl (data points representing percentages from  $n = 3$  independent  
901 experiments, with mean of means, red line; for each experiment at least 10 hyphae were  
902 analysed per strain). (D) (A) Schematic representation of the  $\lambda\text{N} / \lambda\text{N}^*$  RNA live imaging  
903 system ( $P_{\text{otef}}$ , constitutively active promoter;  $P_{\text{crg}}$  arabinose-induced promoter)  $T_{\text{nos}}$ ,  
904 heterologous transcriptional terminator; *ubi1*, ubiquitin fusion protein; *rho3*, small GTPase;  
905 *cdc3* and *cdc12*, septins). All tested target genes carried 16 copies of the boxB hairpin in their  
906 3' UTR.  $\lambda\text{N}^*\text{Gfp}^3$  is recruited to mRNAs containing the  $\lambda\text{N}$ -binding sites designated boxB  
907 [14]. (E) Velocity of fluorescent signals of analysed mRNAs (velocity of tracks with  $> 3 \mu\text{m}$   
908 processive movement; data points representing means from  $n = 3$  independent experiments,  
909 with mean of means, red line, and s.e.m.; unpaired two-tailed Student's t-test; for each  
910 experiment more than seven hyphae were analysed per strain). Merged datasets of all values  
911 are shown.

Jankowski, Pohlmann et al.

912 **Figure EV5. Upa2 has extensive intrinsically disordered regions.**

913 Analysis of intrinsically disordered regions using the PONDR algorithm VL3-BA. Amino  
914 acids are given prediction values between 0 and 1. Regions with values of 0.5 or above are  
915 considered disordered and are marked red, while peptide regions with values lower than 0.5  
916 are considered ordered and are marked blue. The graphical output for the prediction is  
917 depicted in relation to the protein, shown below the graph. The size of the protein models is  
918 adjusted to the graph size. Extensive regions of Upa2 (>80%) are predicted to be disordered.  
919 Additionally, further known components of endosomal mRNA-transport, Rrm4, Upa1 and  
920 Pab1, show significant disordered stretches. Gapdh of *U. maydis* is shown as a structured  
921 protein in comparison.

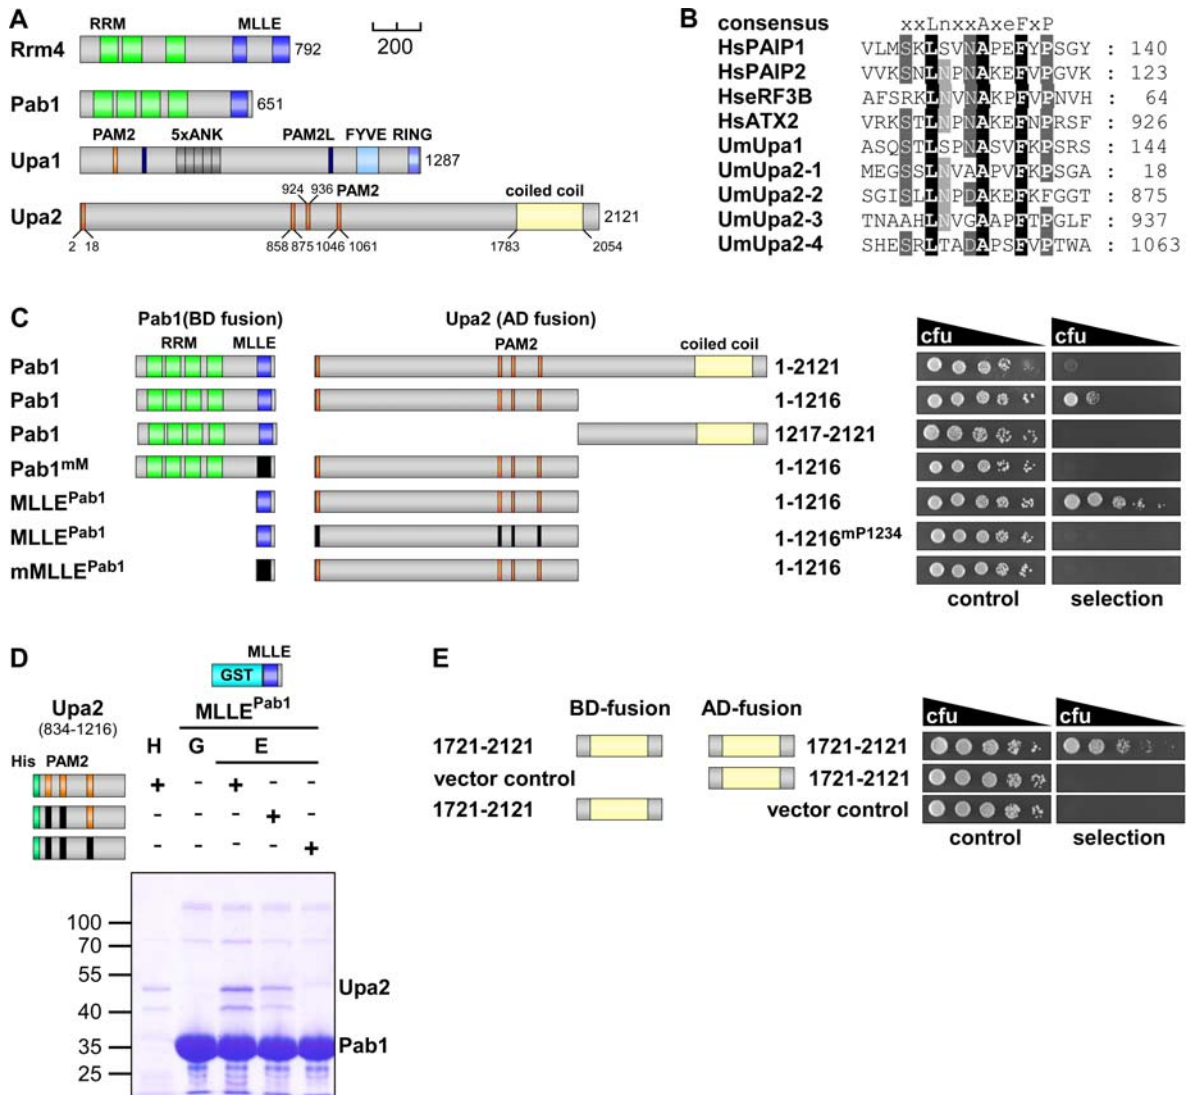

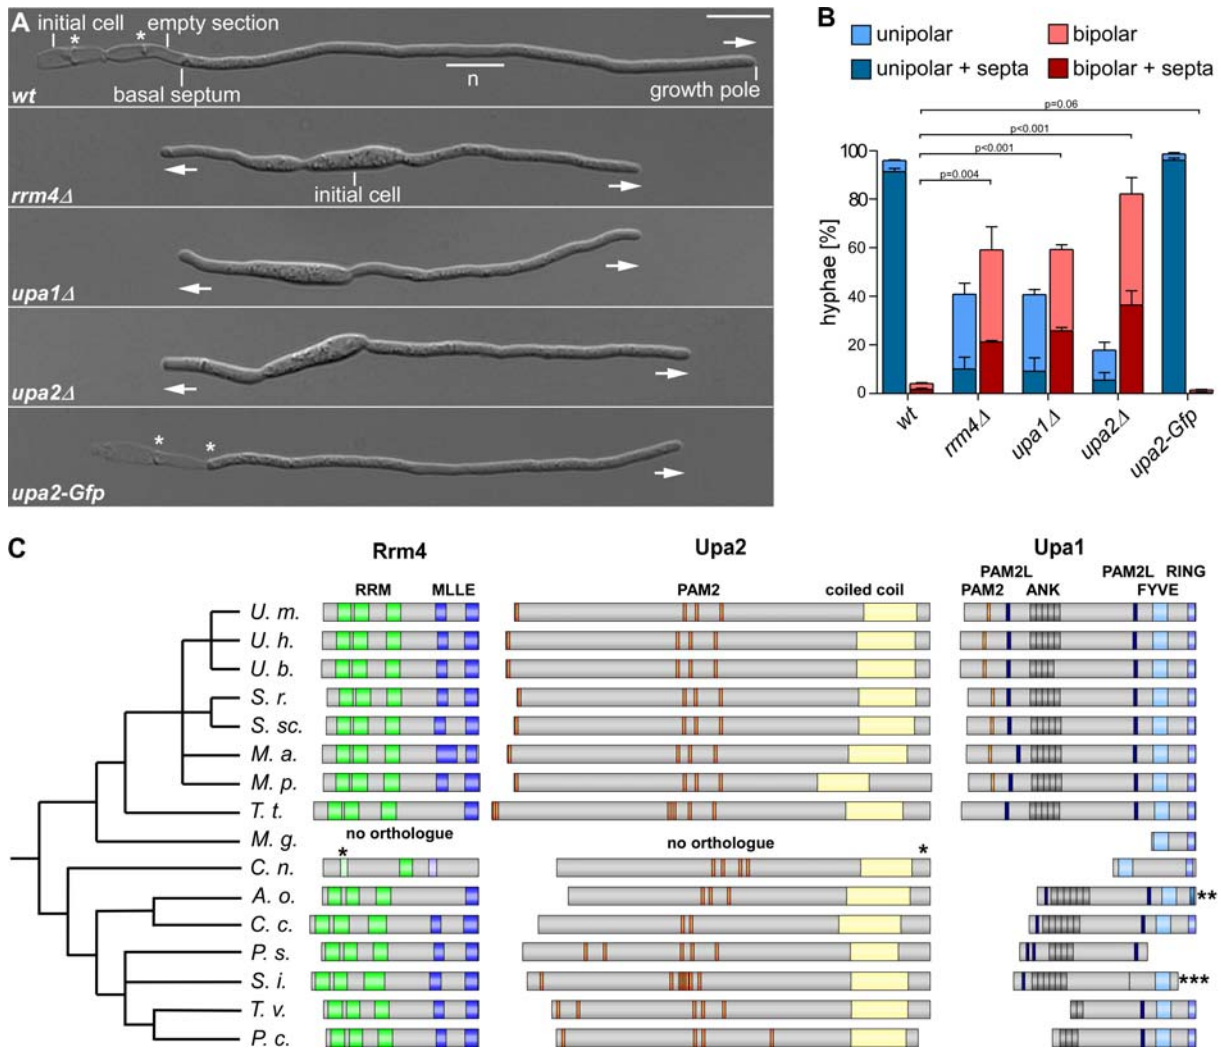

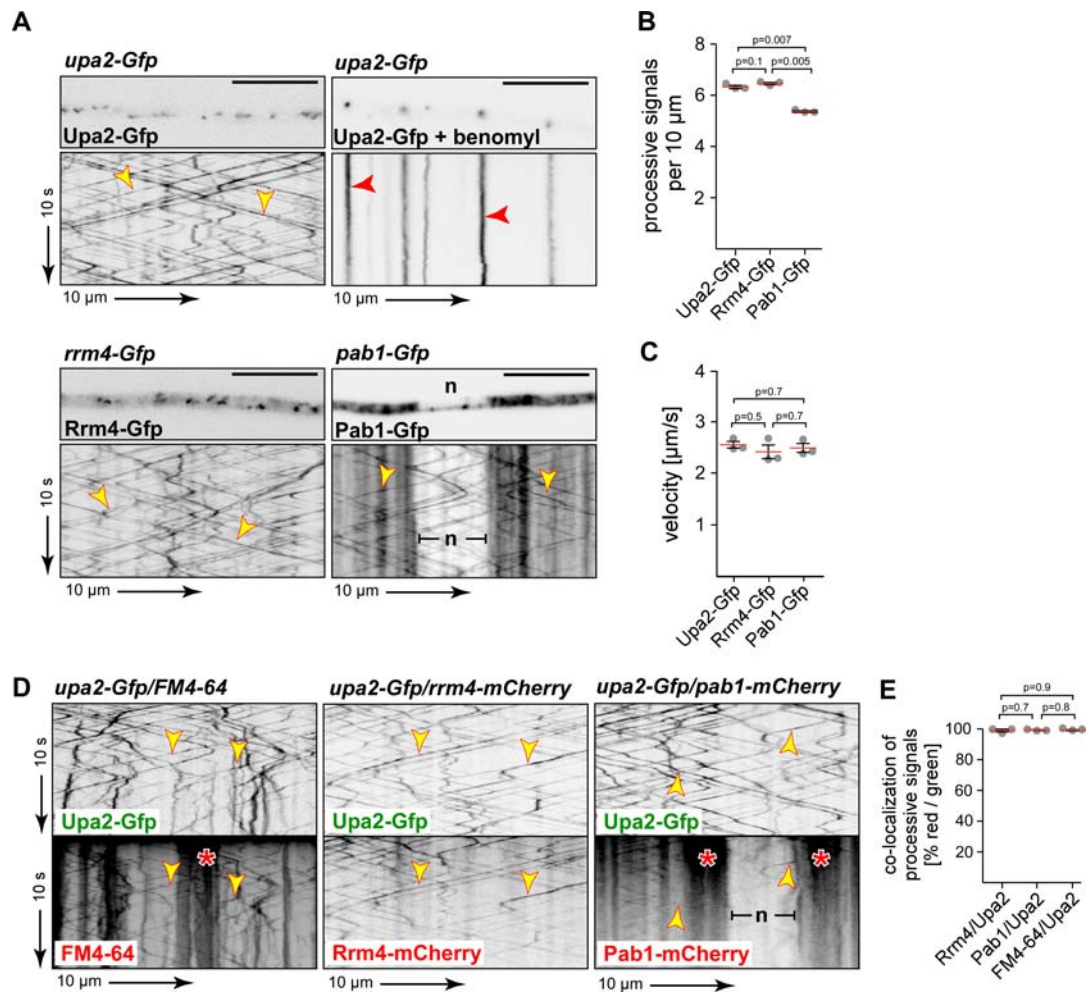

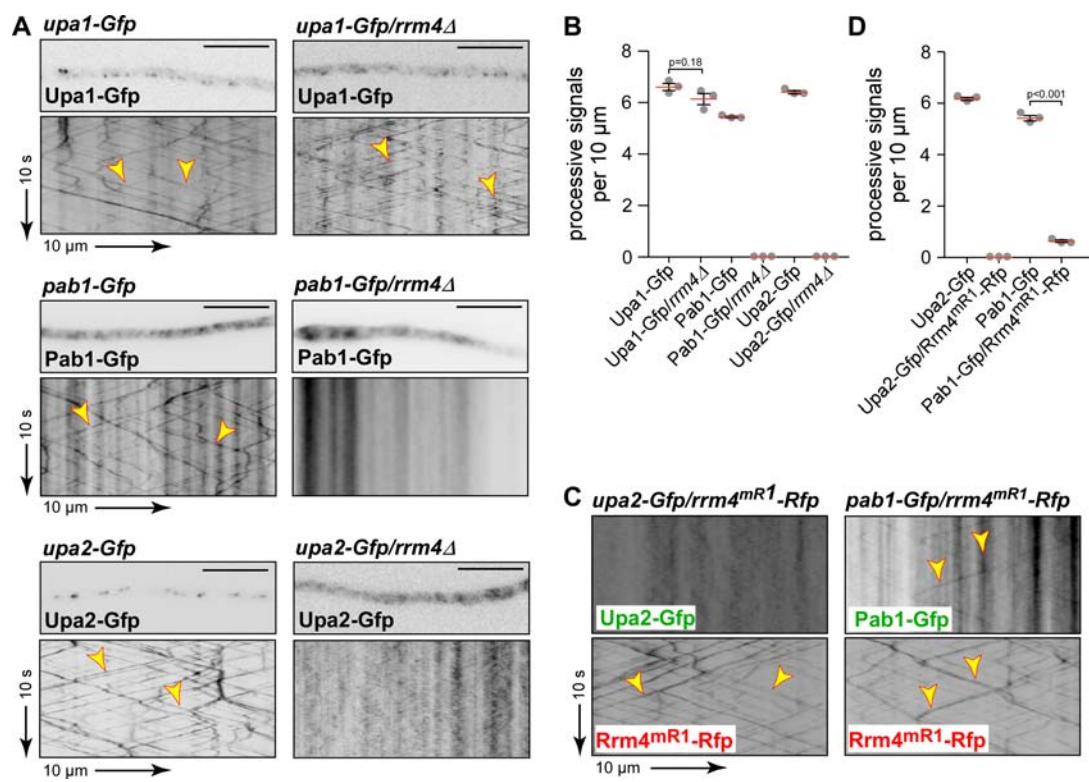



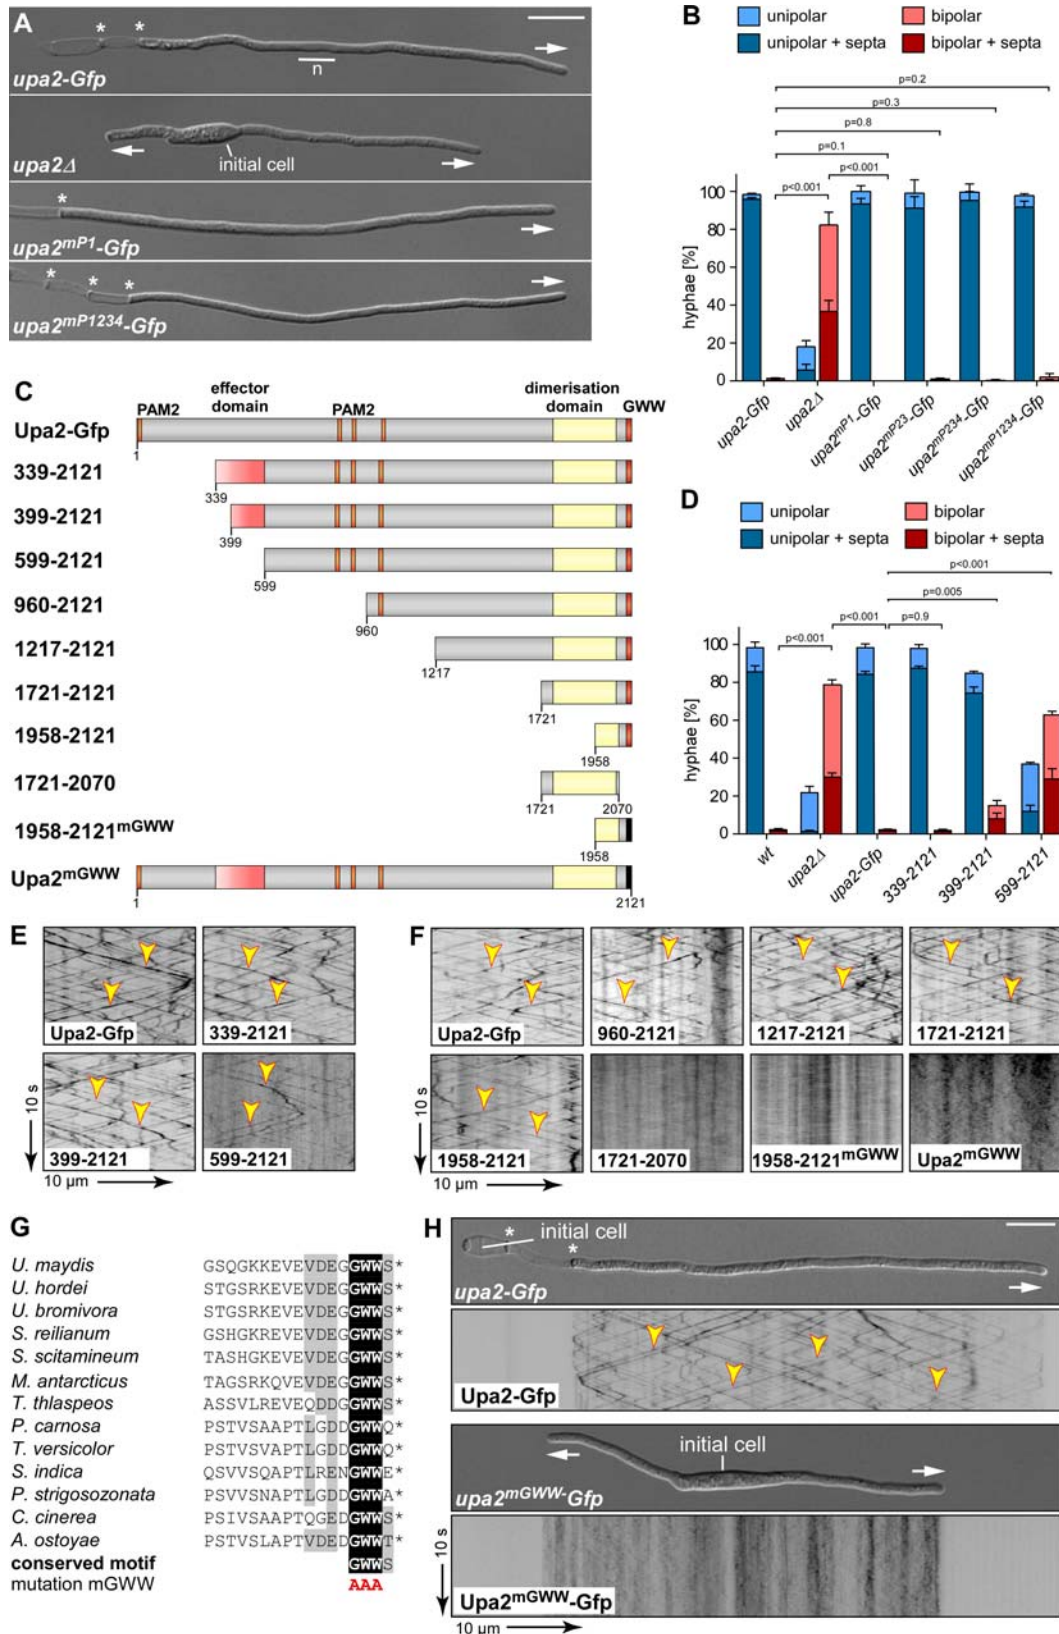

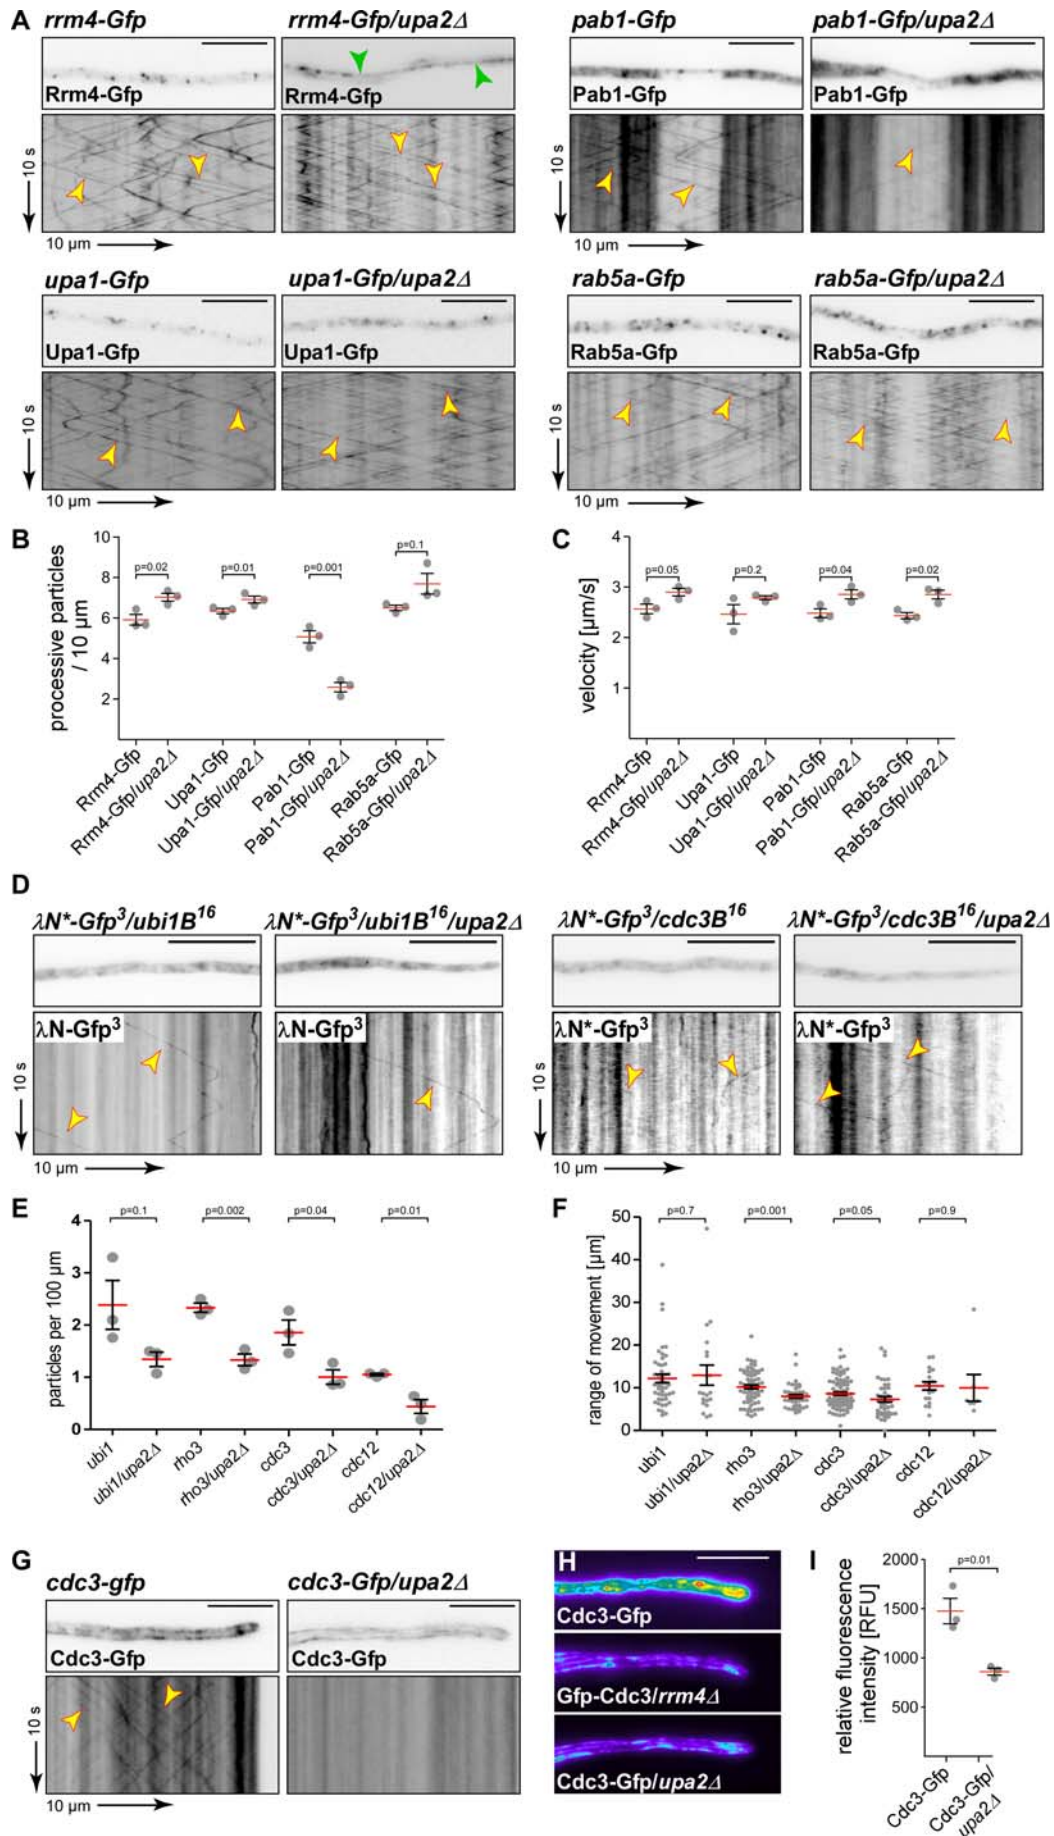

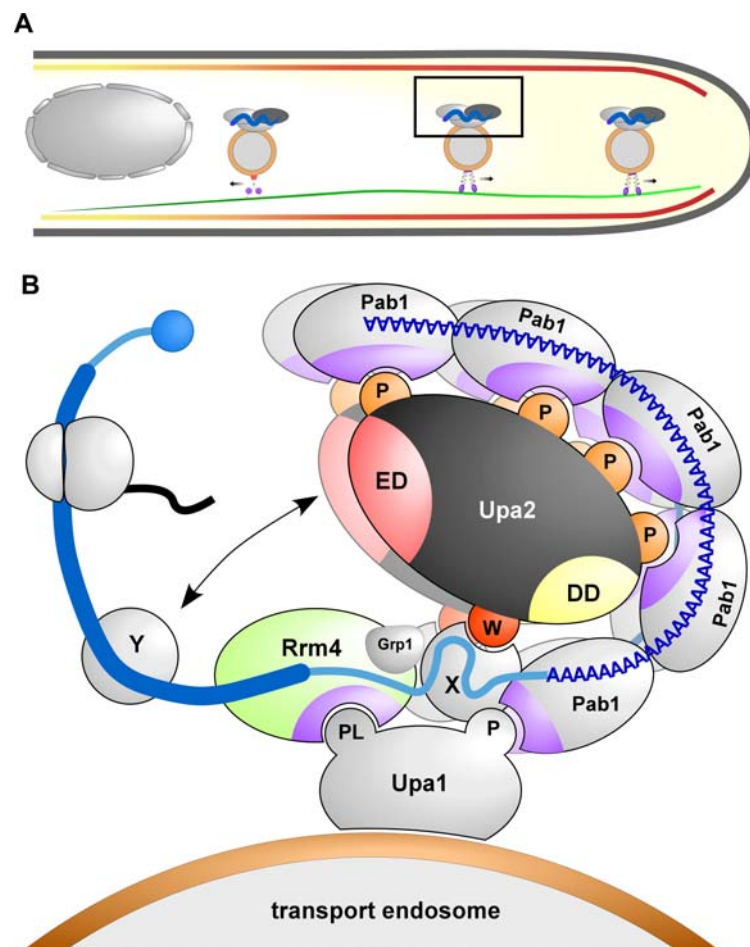

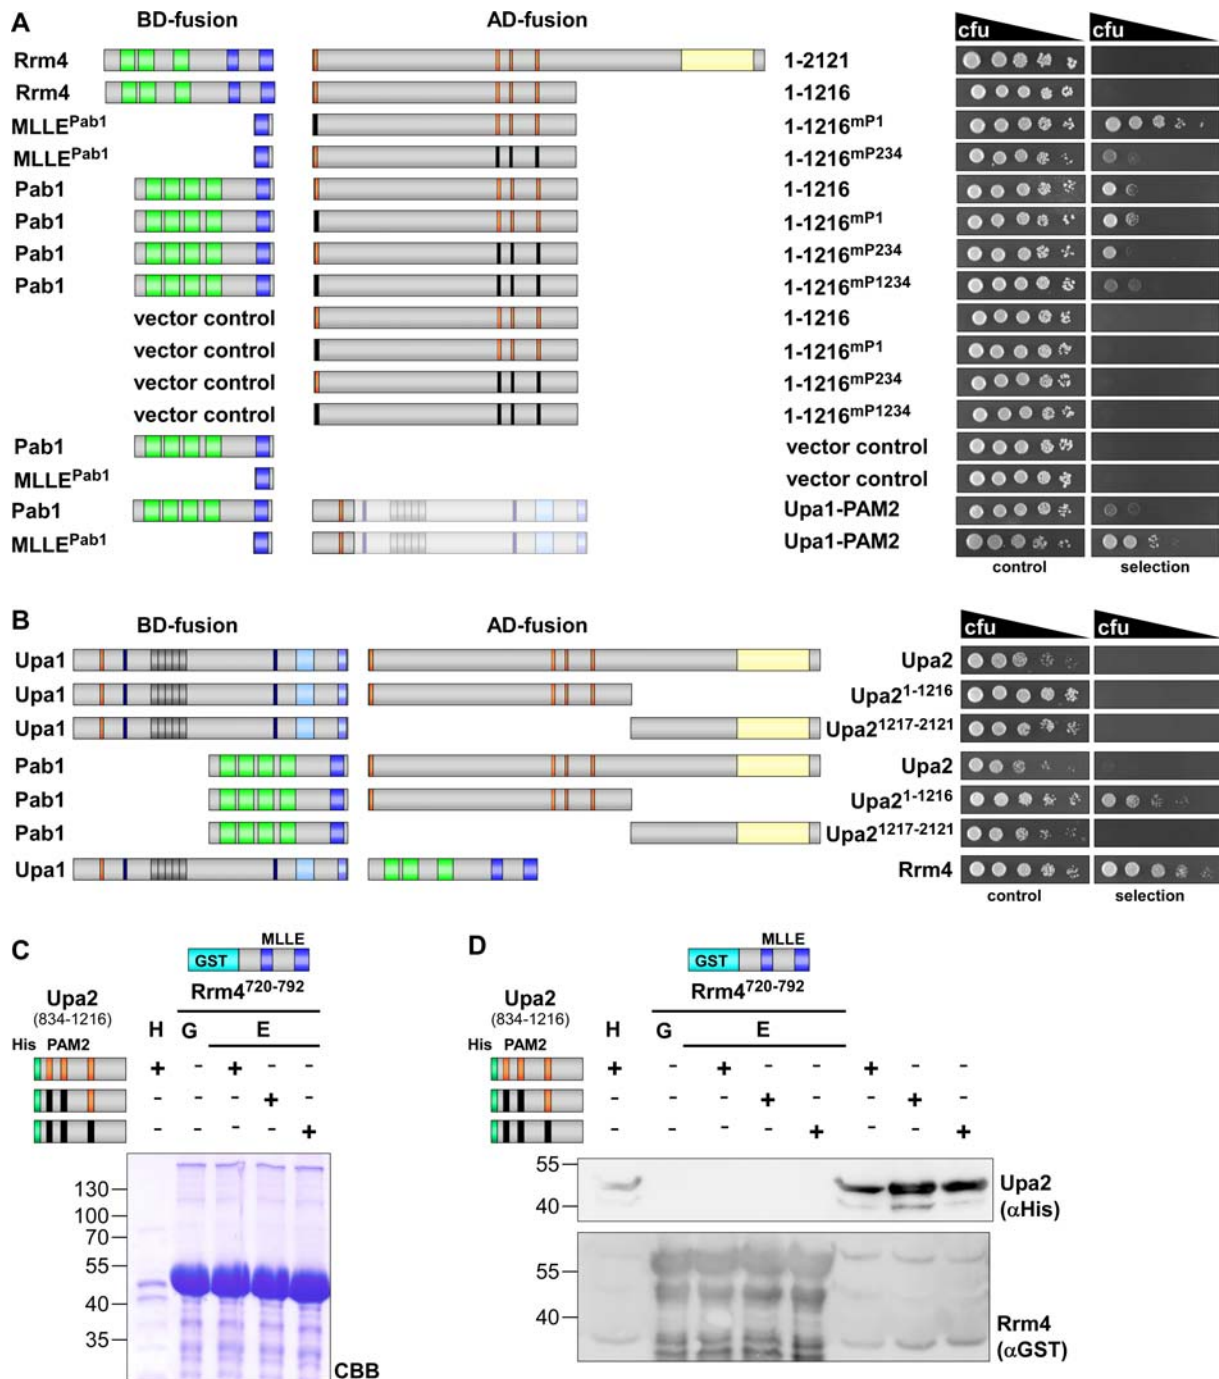

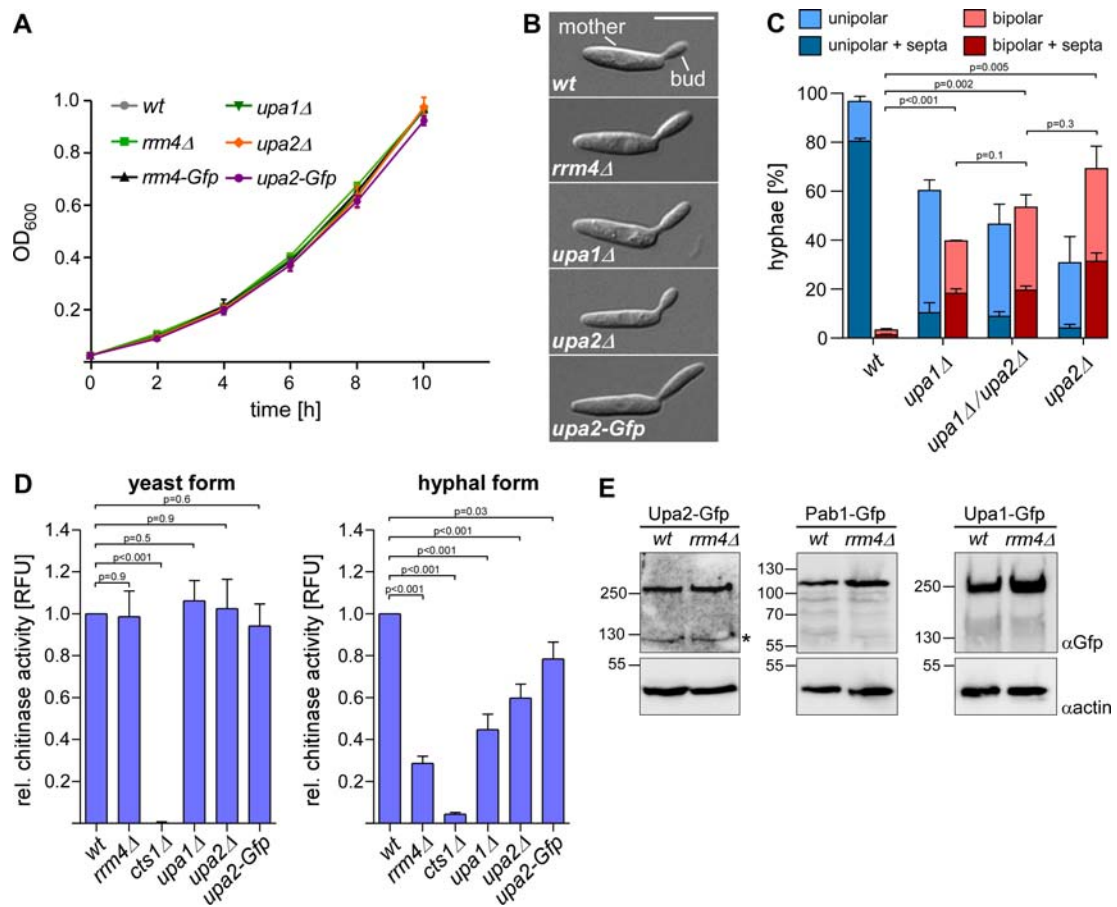

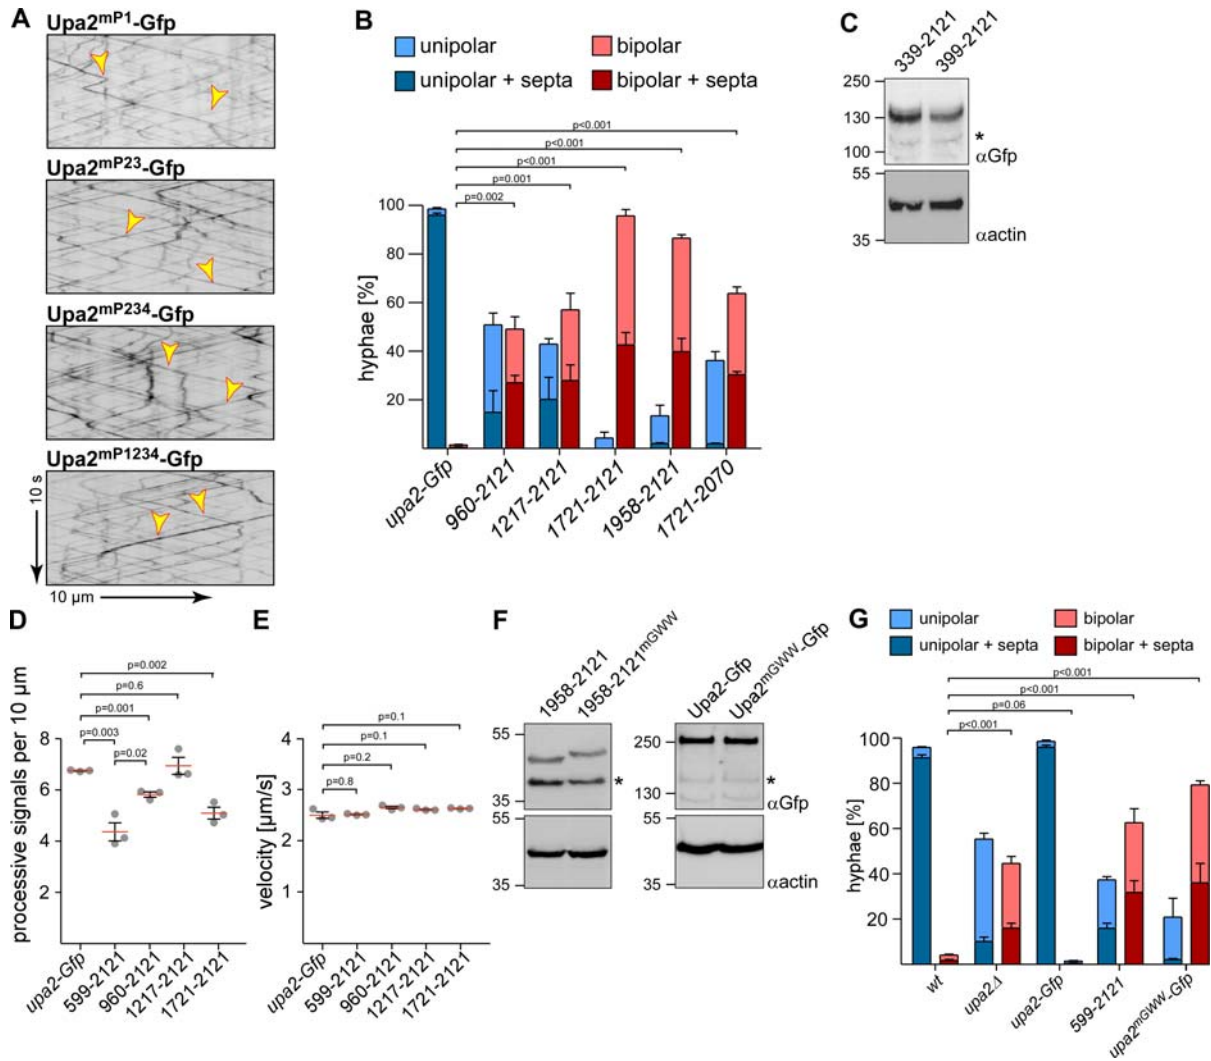

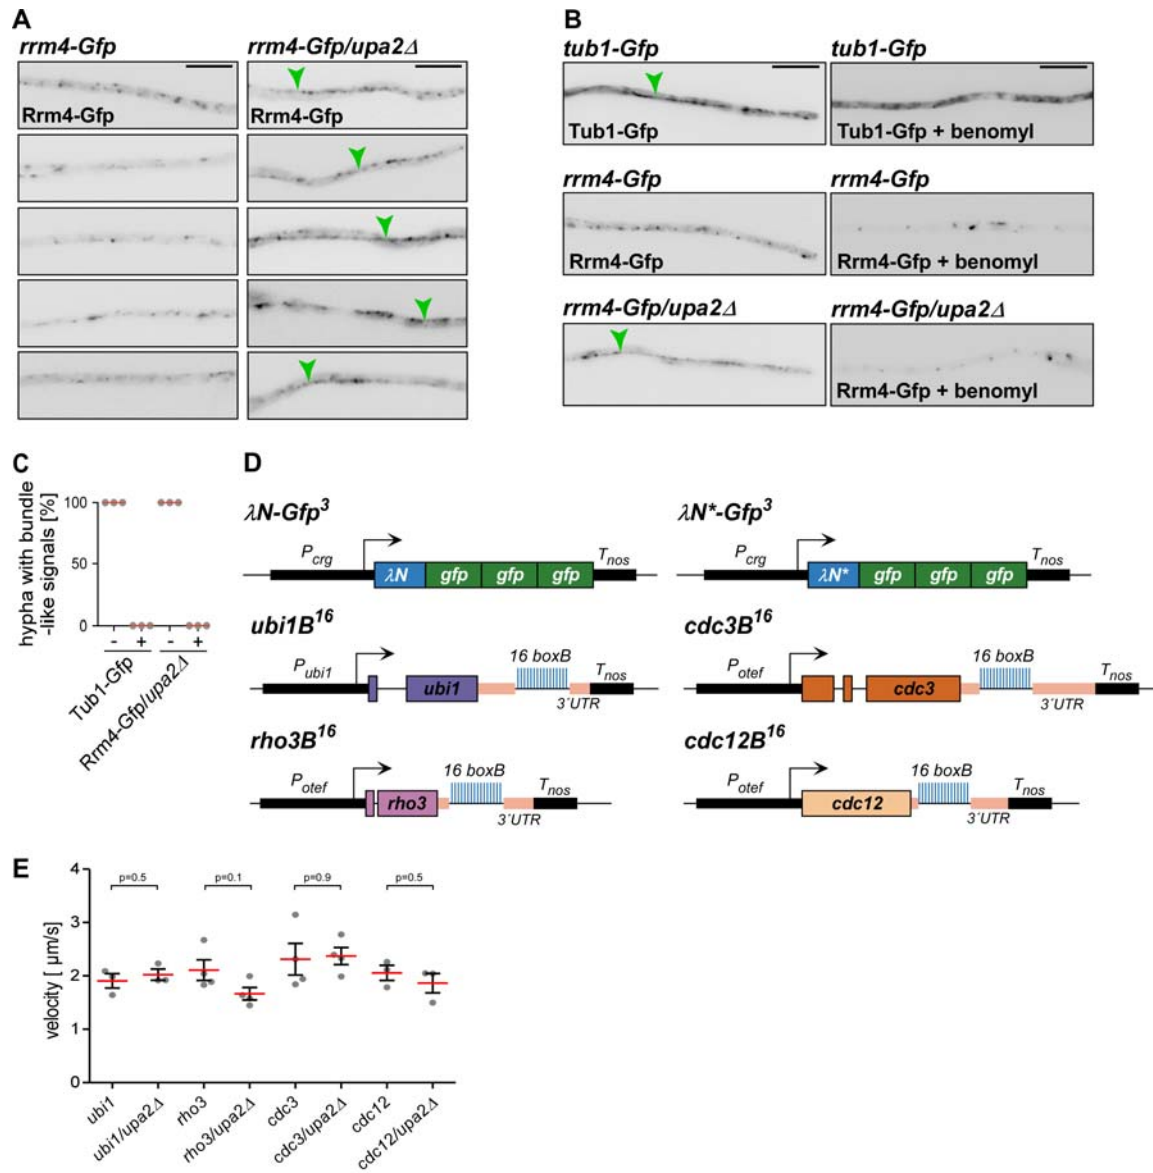

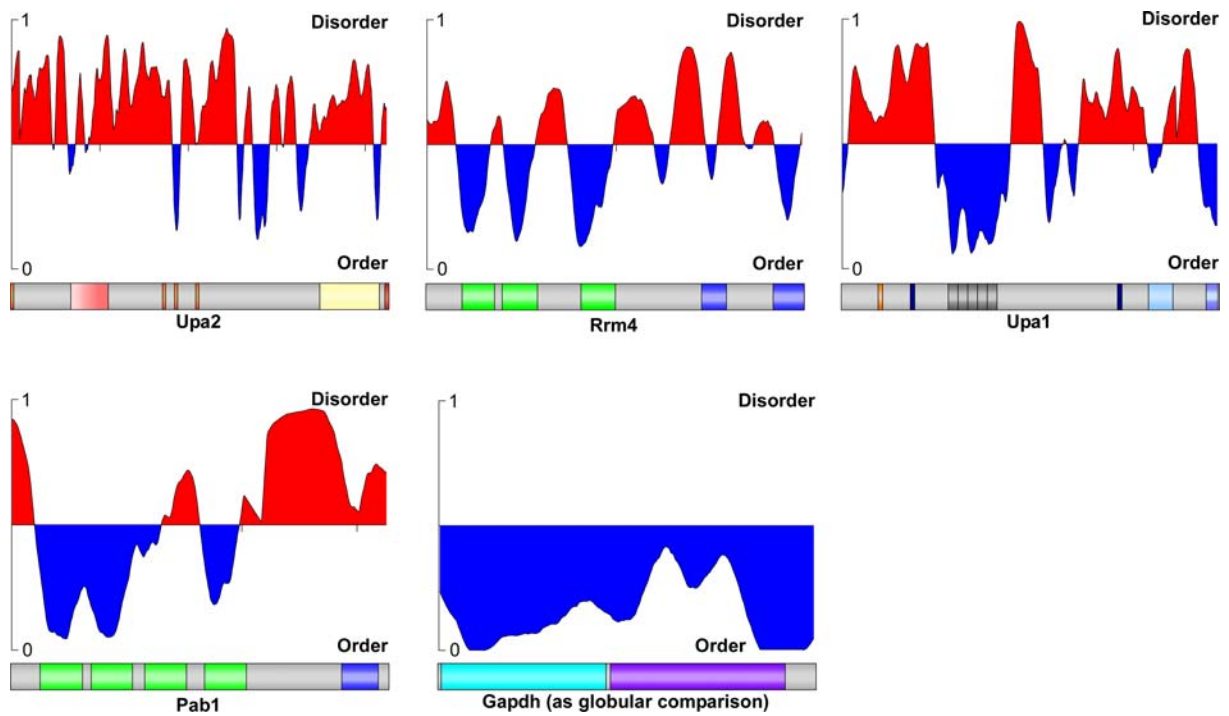

Source: http://biorxiv.org/content/10.1101/455378v2.full.pdf
